# Supplementary material for: Microstructure and texture evolution in polycrystalline ice during hot torsion. Impact of intragranular strain and recrystallization processes
Source: Copernicus journal article supplement (doi:10.5194/tc-2018-213), 2018-11-07

# Supplementary material

## Experimental apparatus

a) Photograph of the torsion apparatus

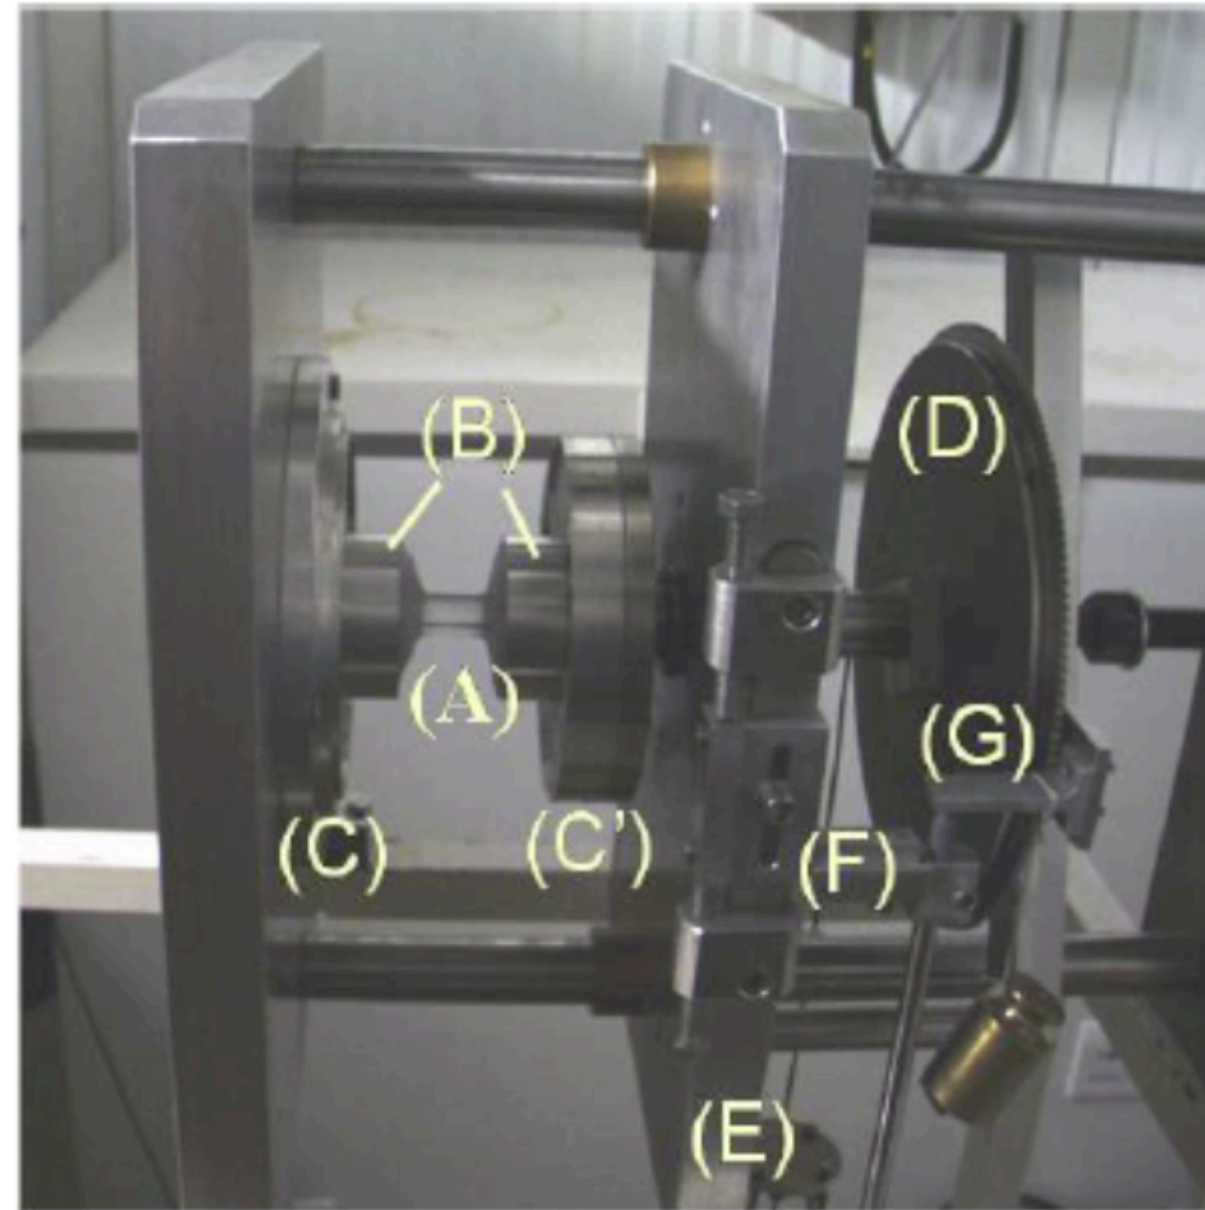

b) Schematic of the torsion apparatus

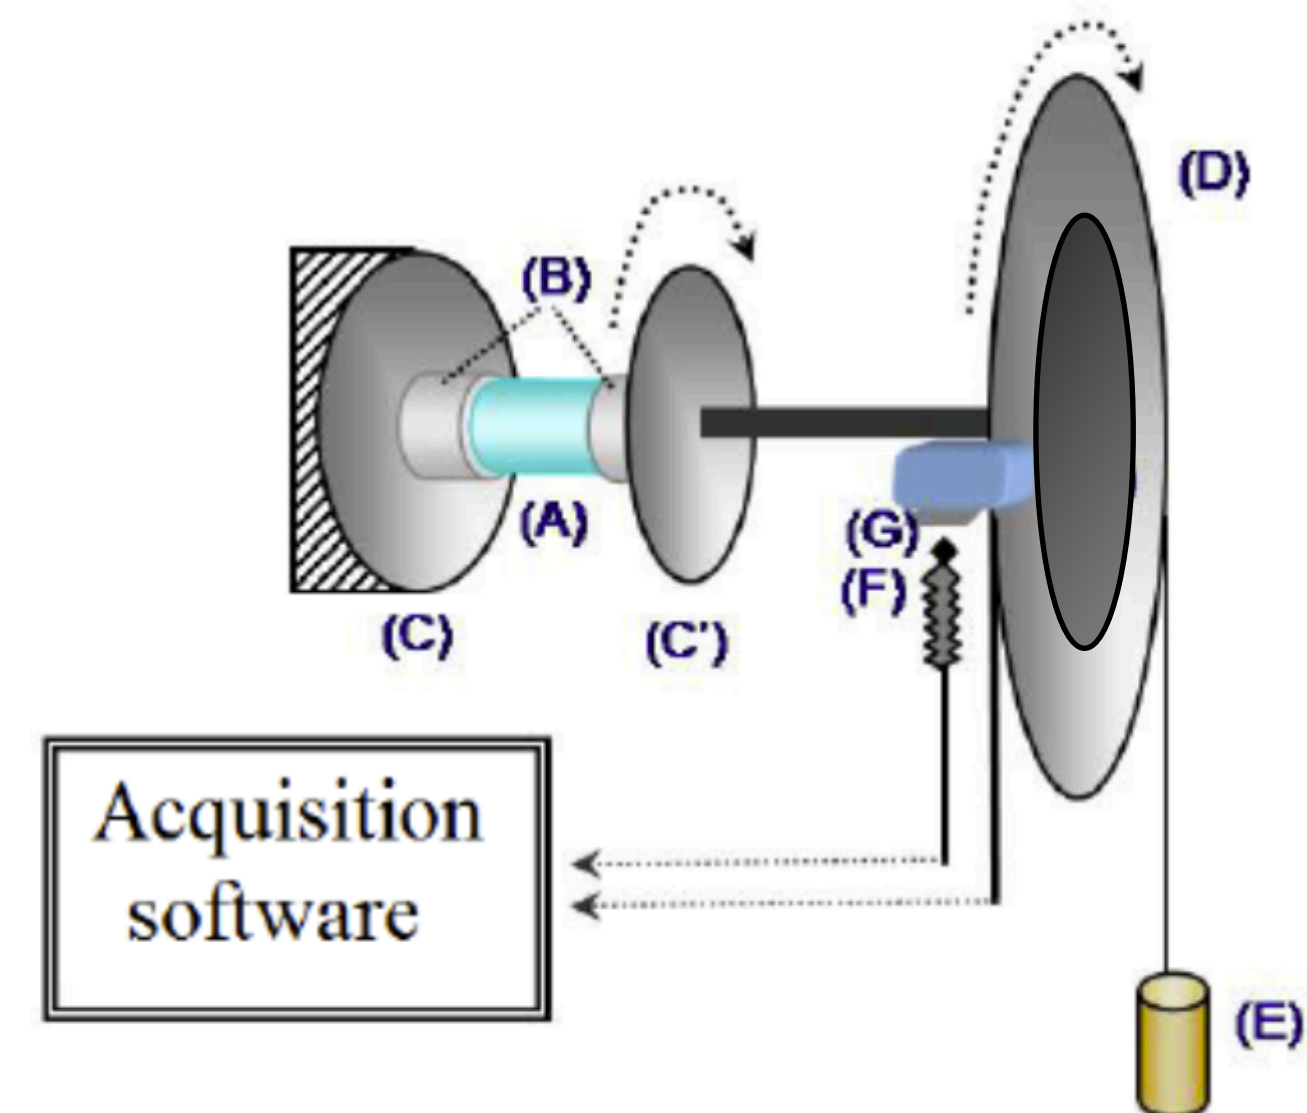

A : Sample

B : Sample support

C : Fixed plate

C' : Rotating plate with no axial movement

D : Rotating wheel solitary of C' with attachment for mass

E : Mass

F : Fixed Linear Variable Differential Transformer (LVDT) to measure macroscopic strain (Optical rotary encoder device not shown here for clarity)

G : LVDT Stop interdependent of the rotating wheel D

$\langle 0001 \rangle$

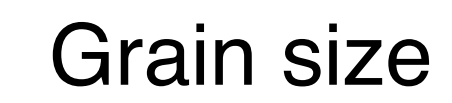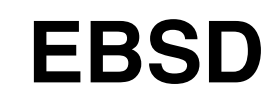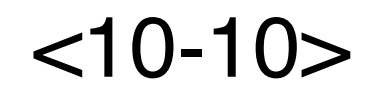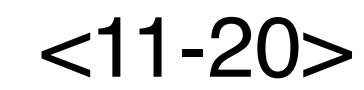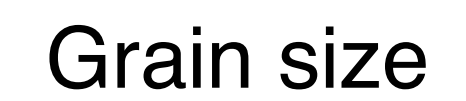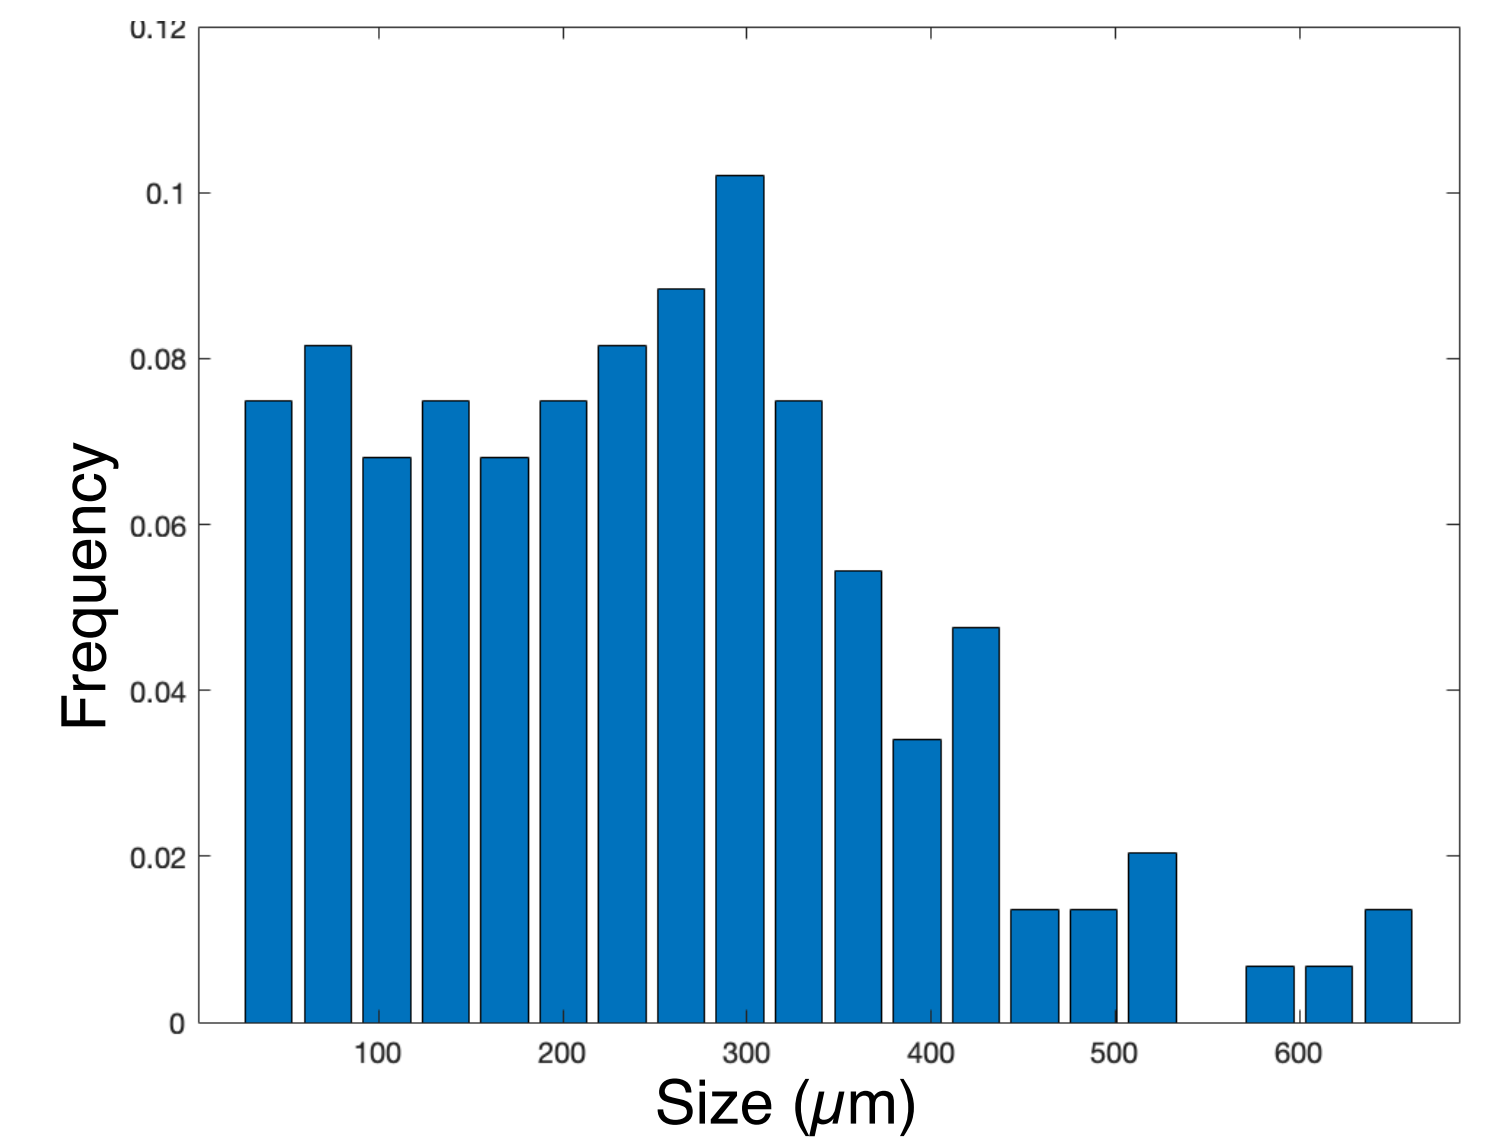



AITA

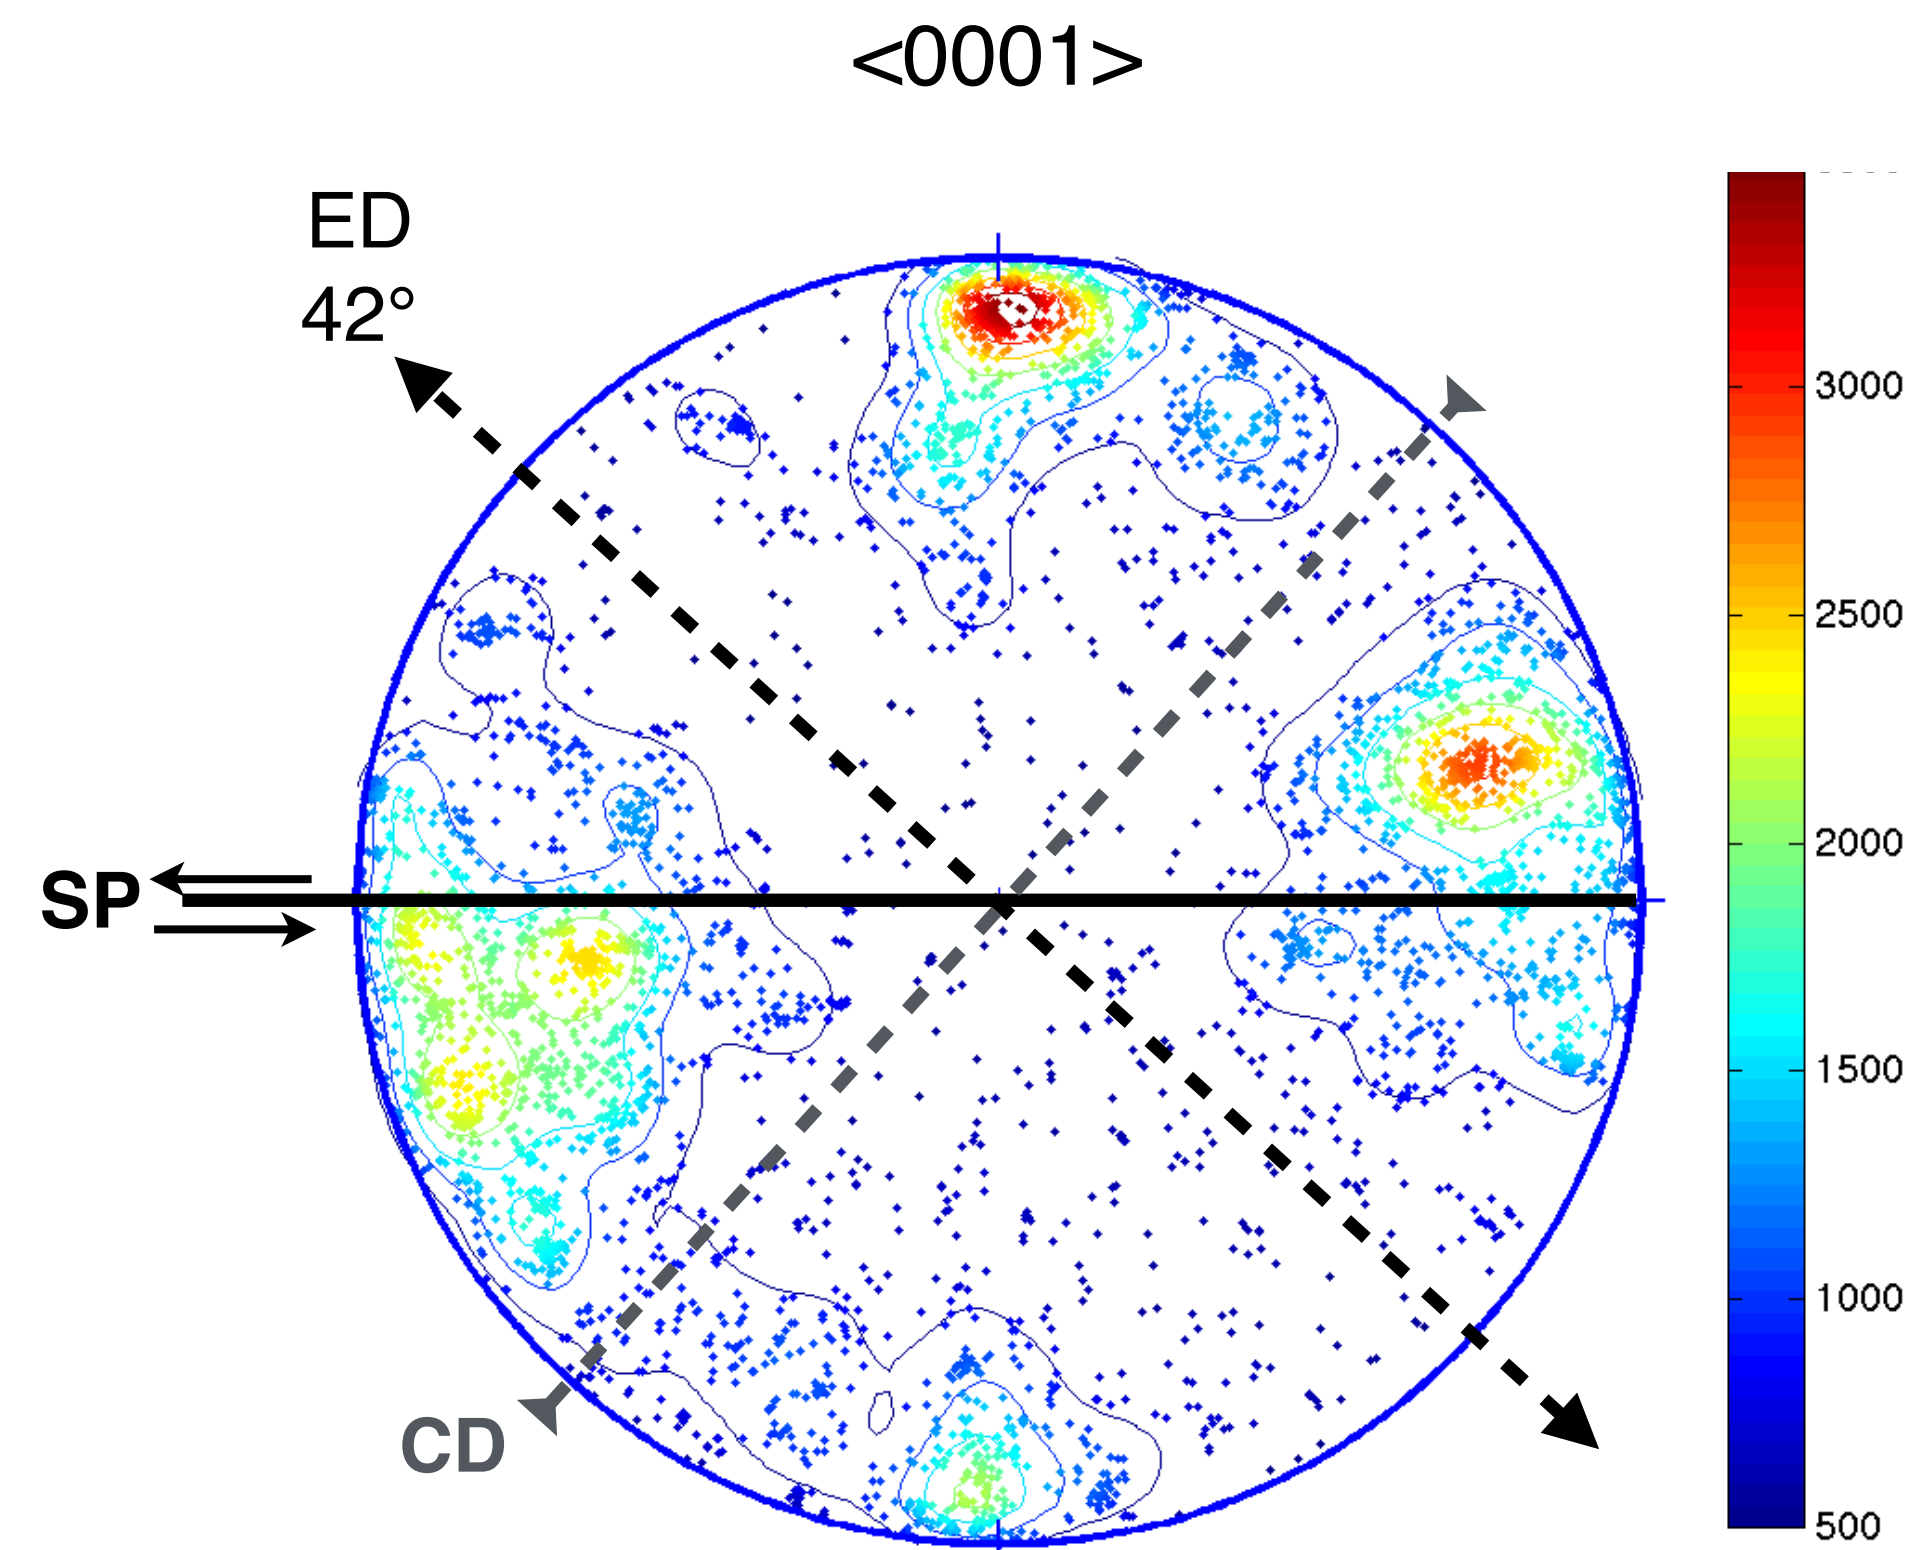

Grain size frequency

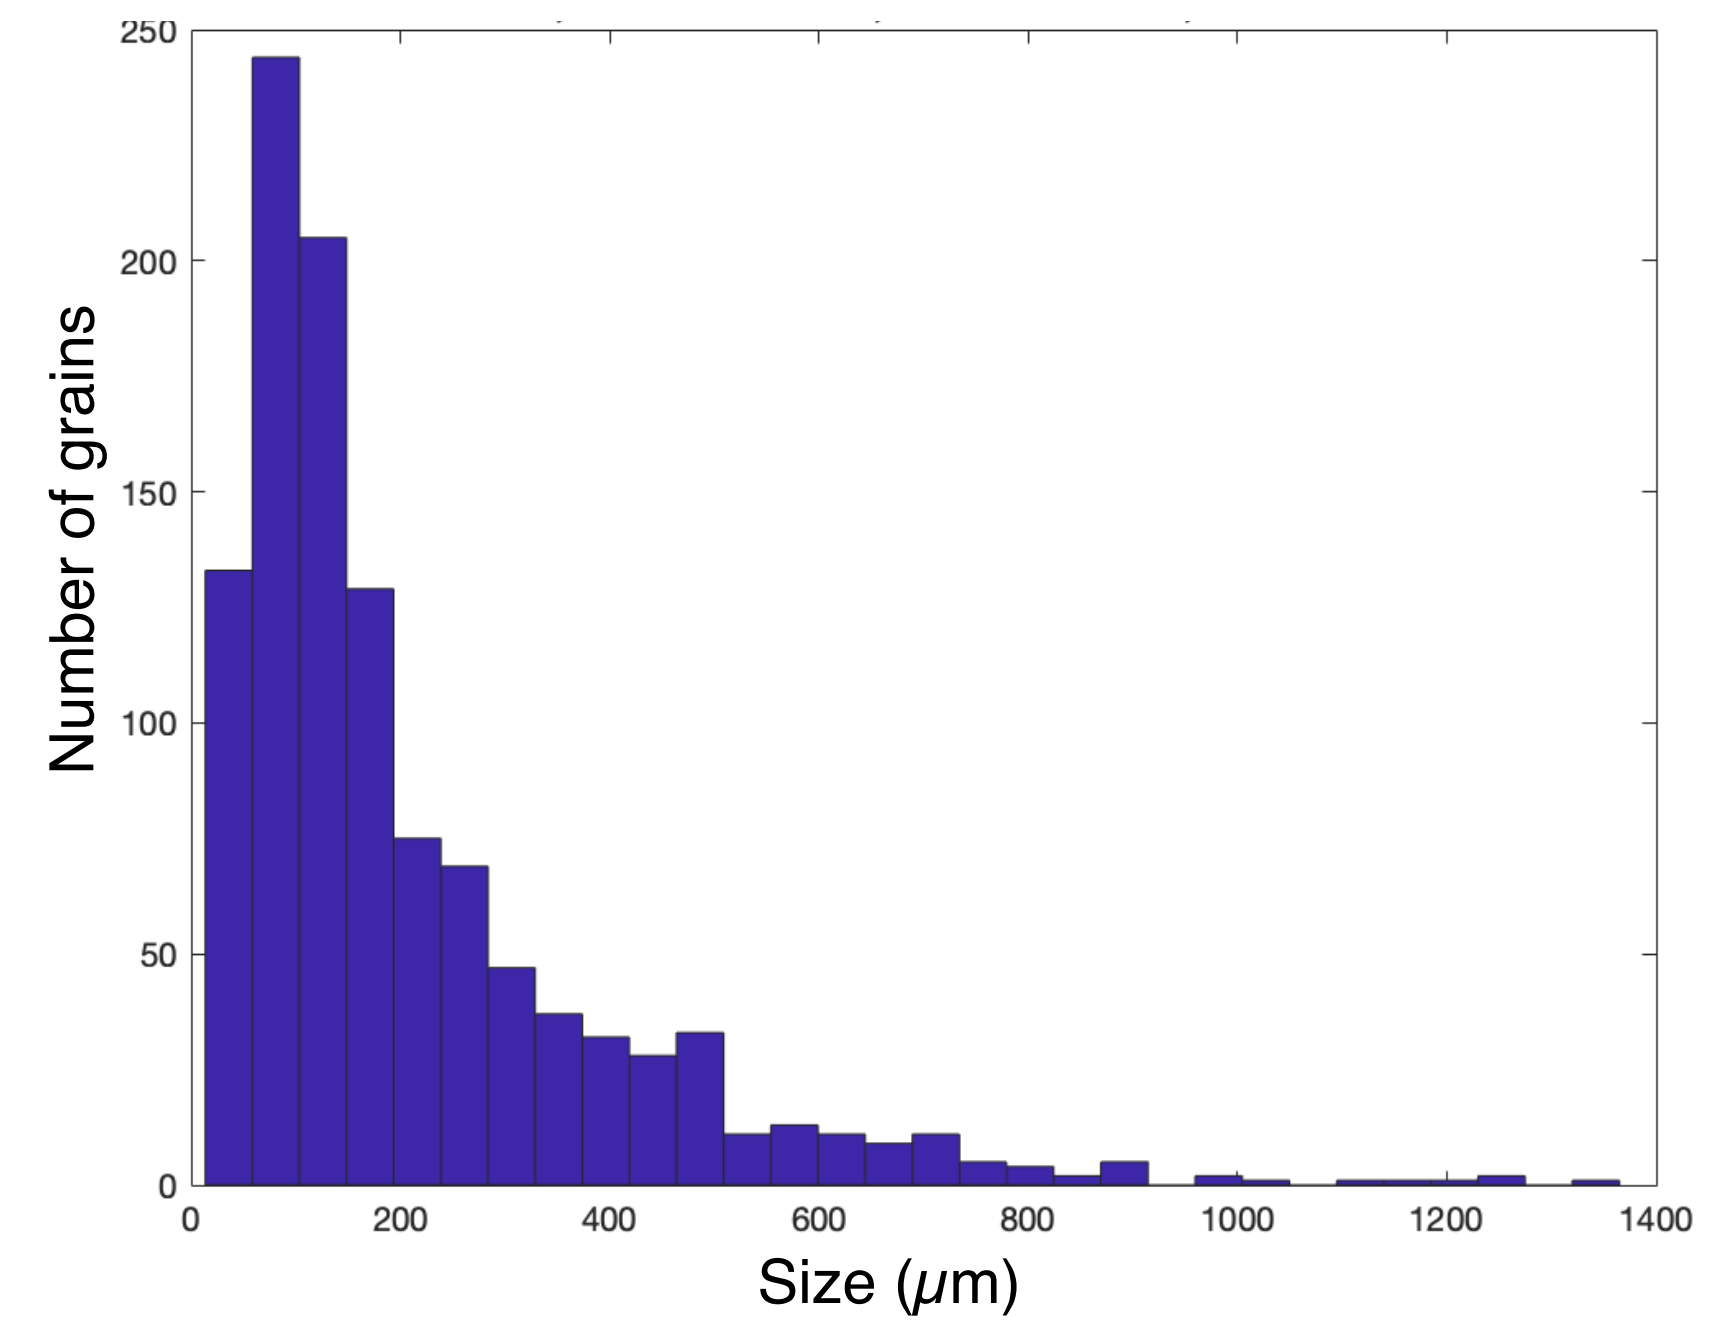

EBSD

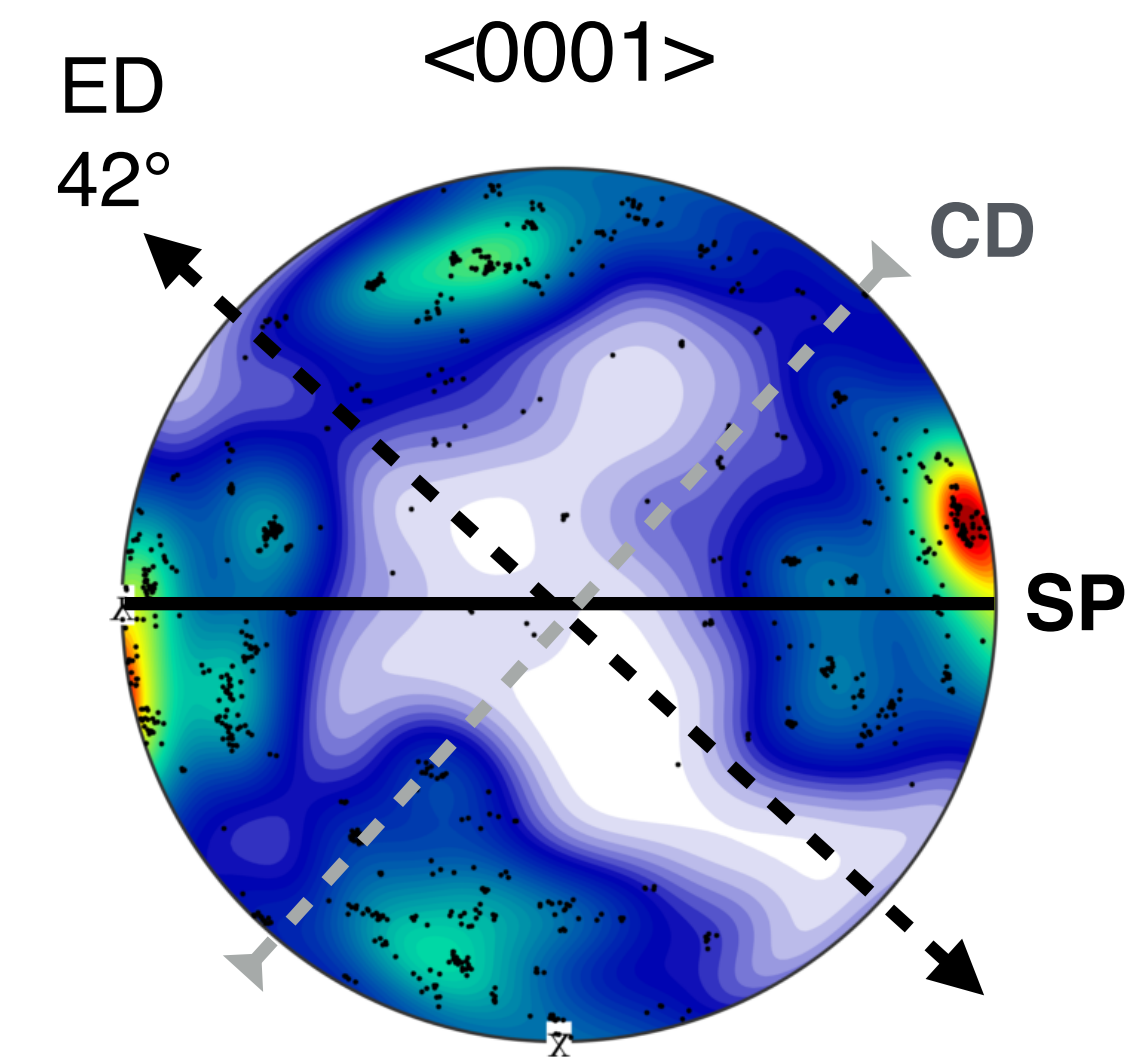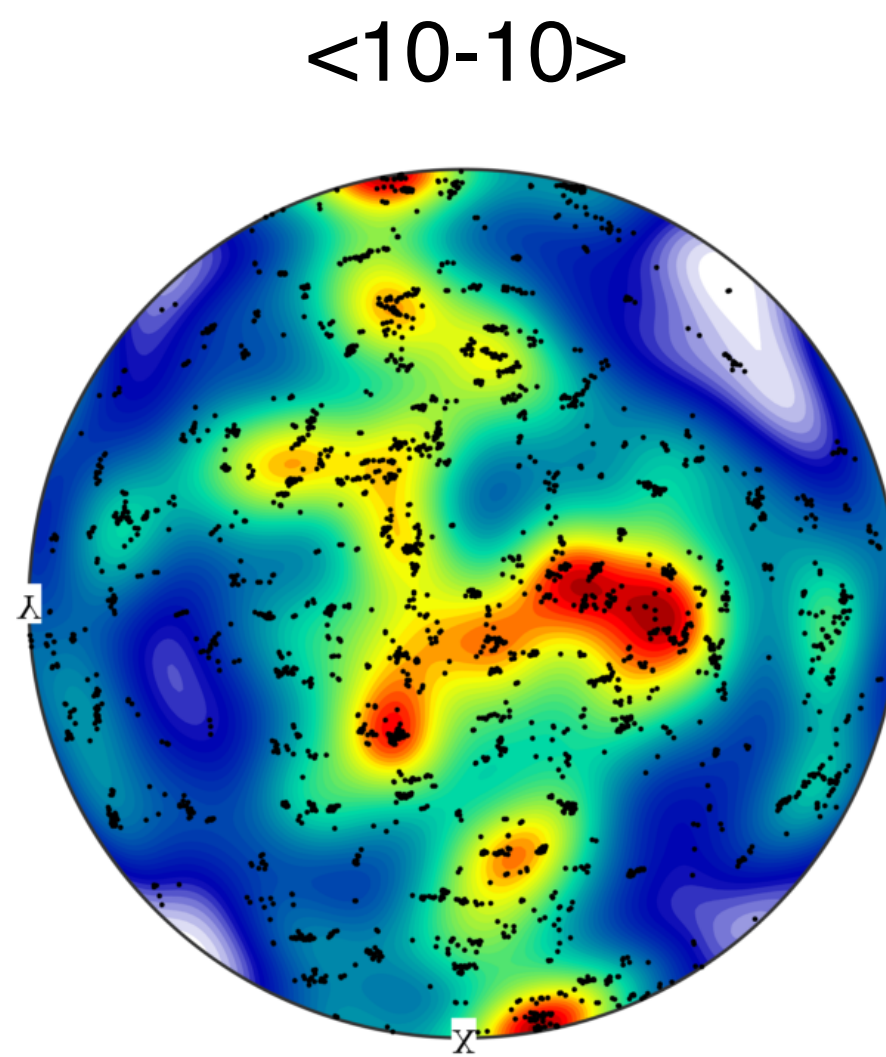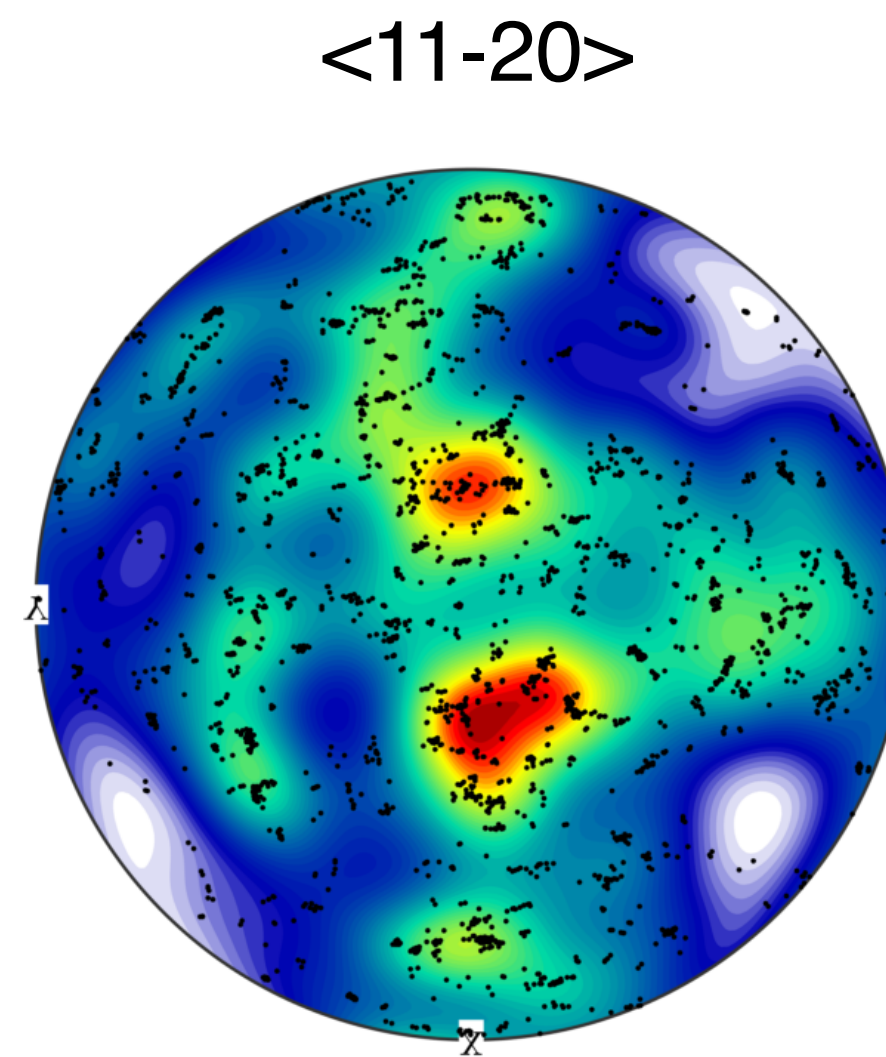

Grain size

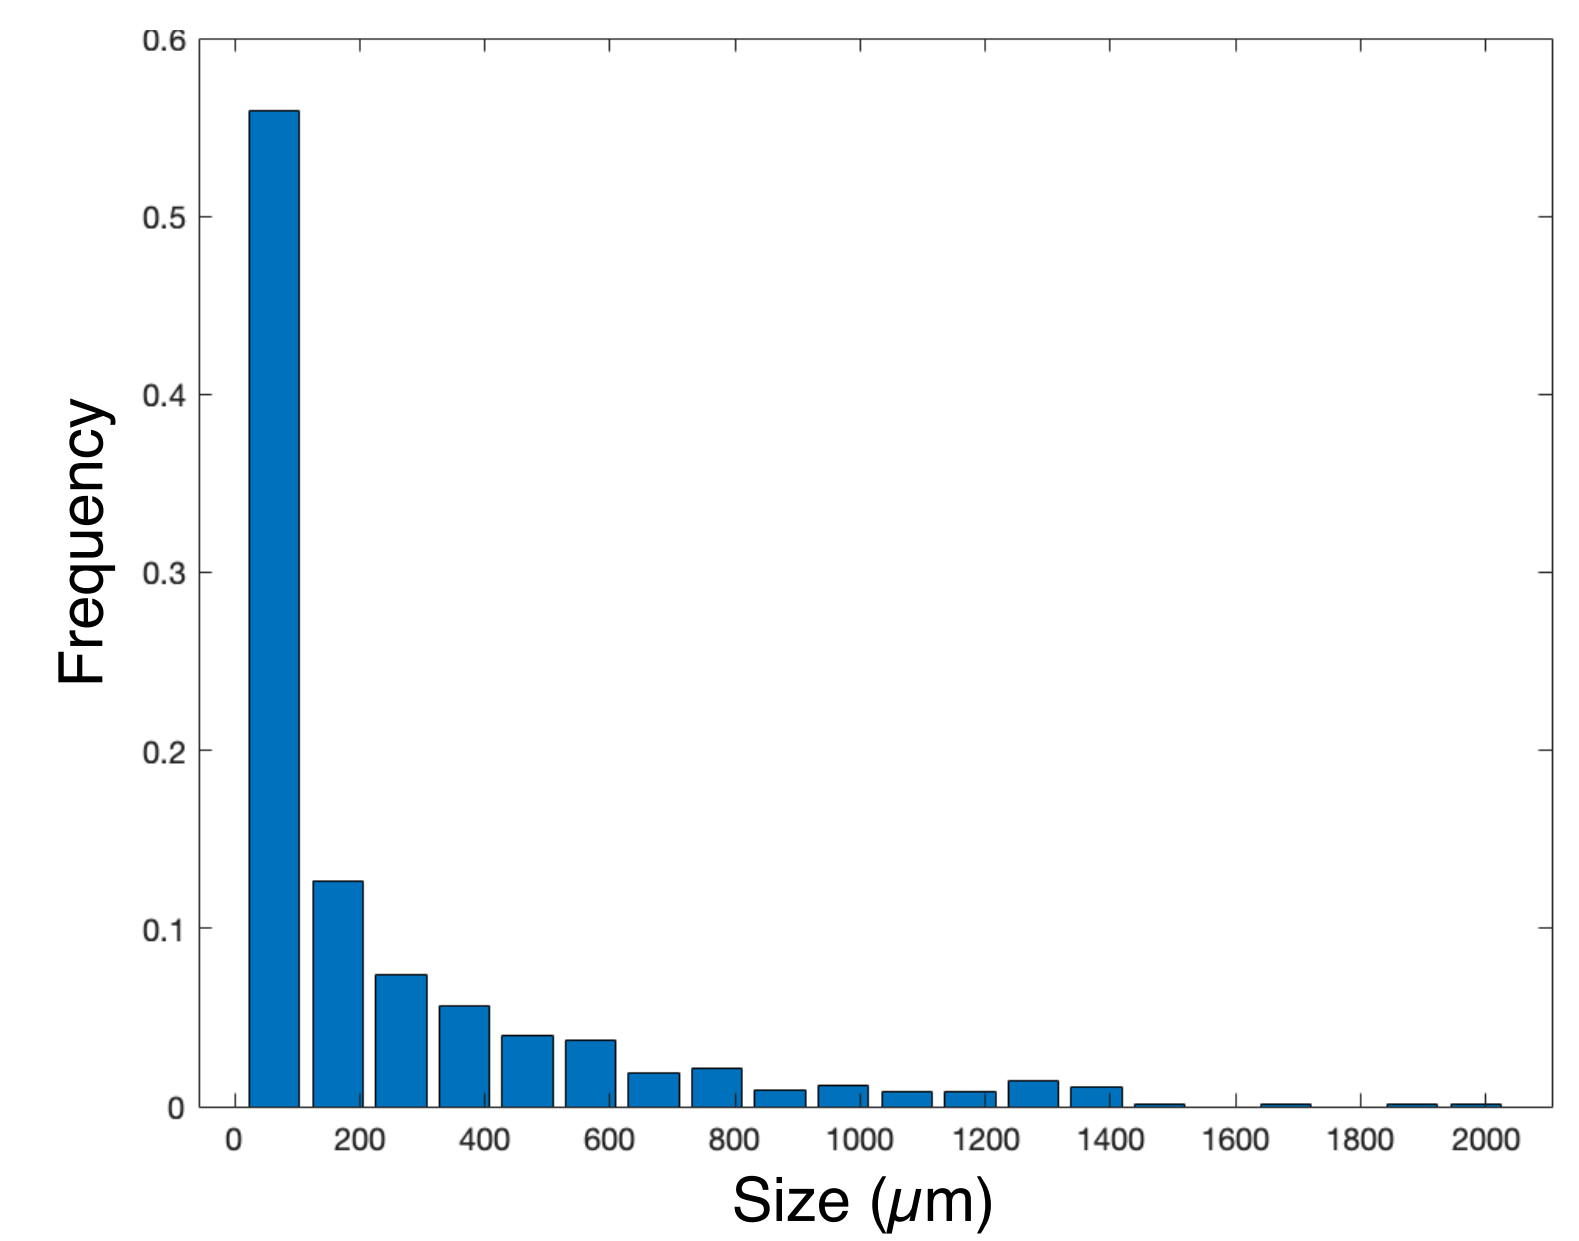



AITA

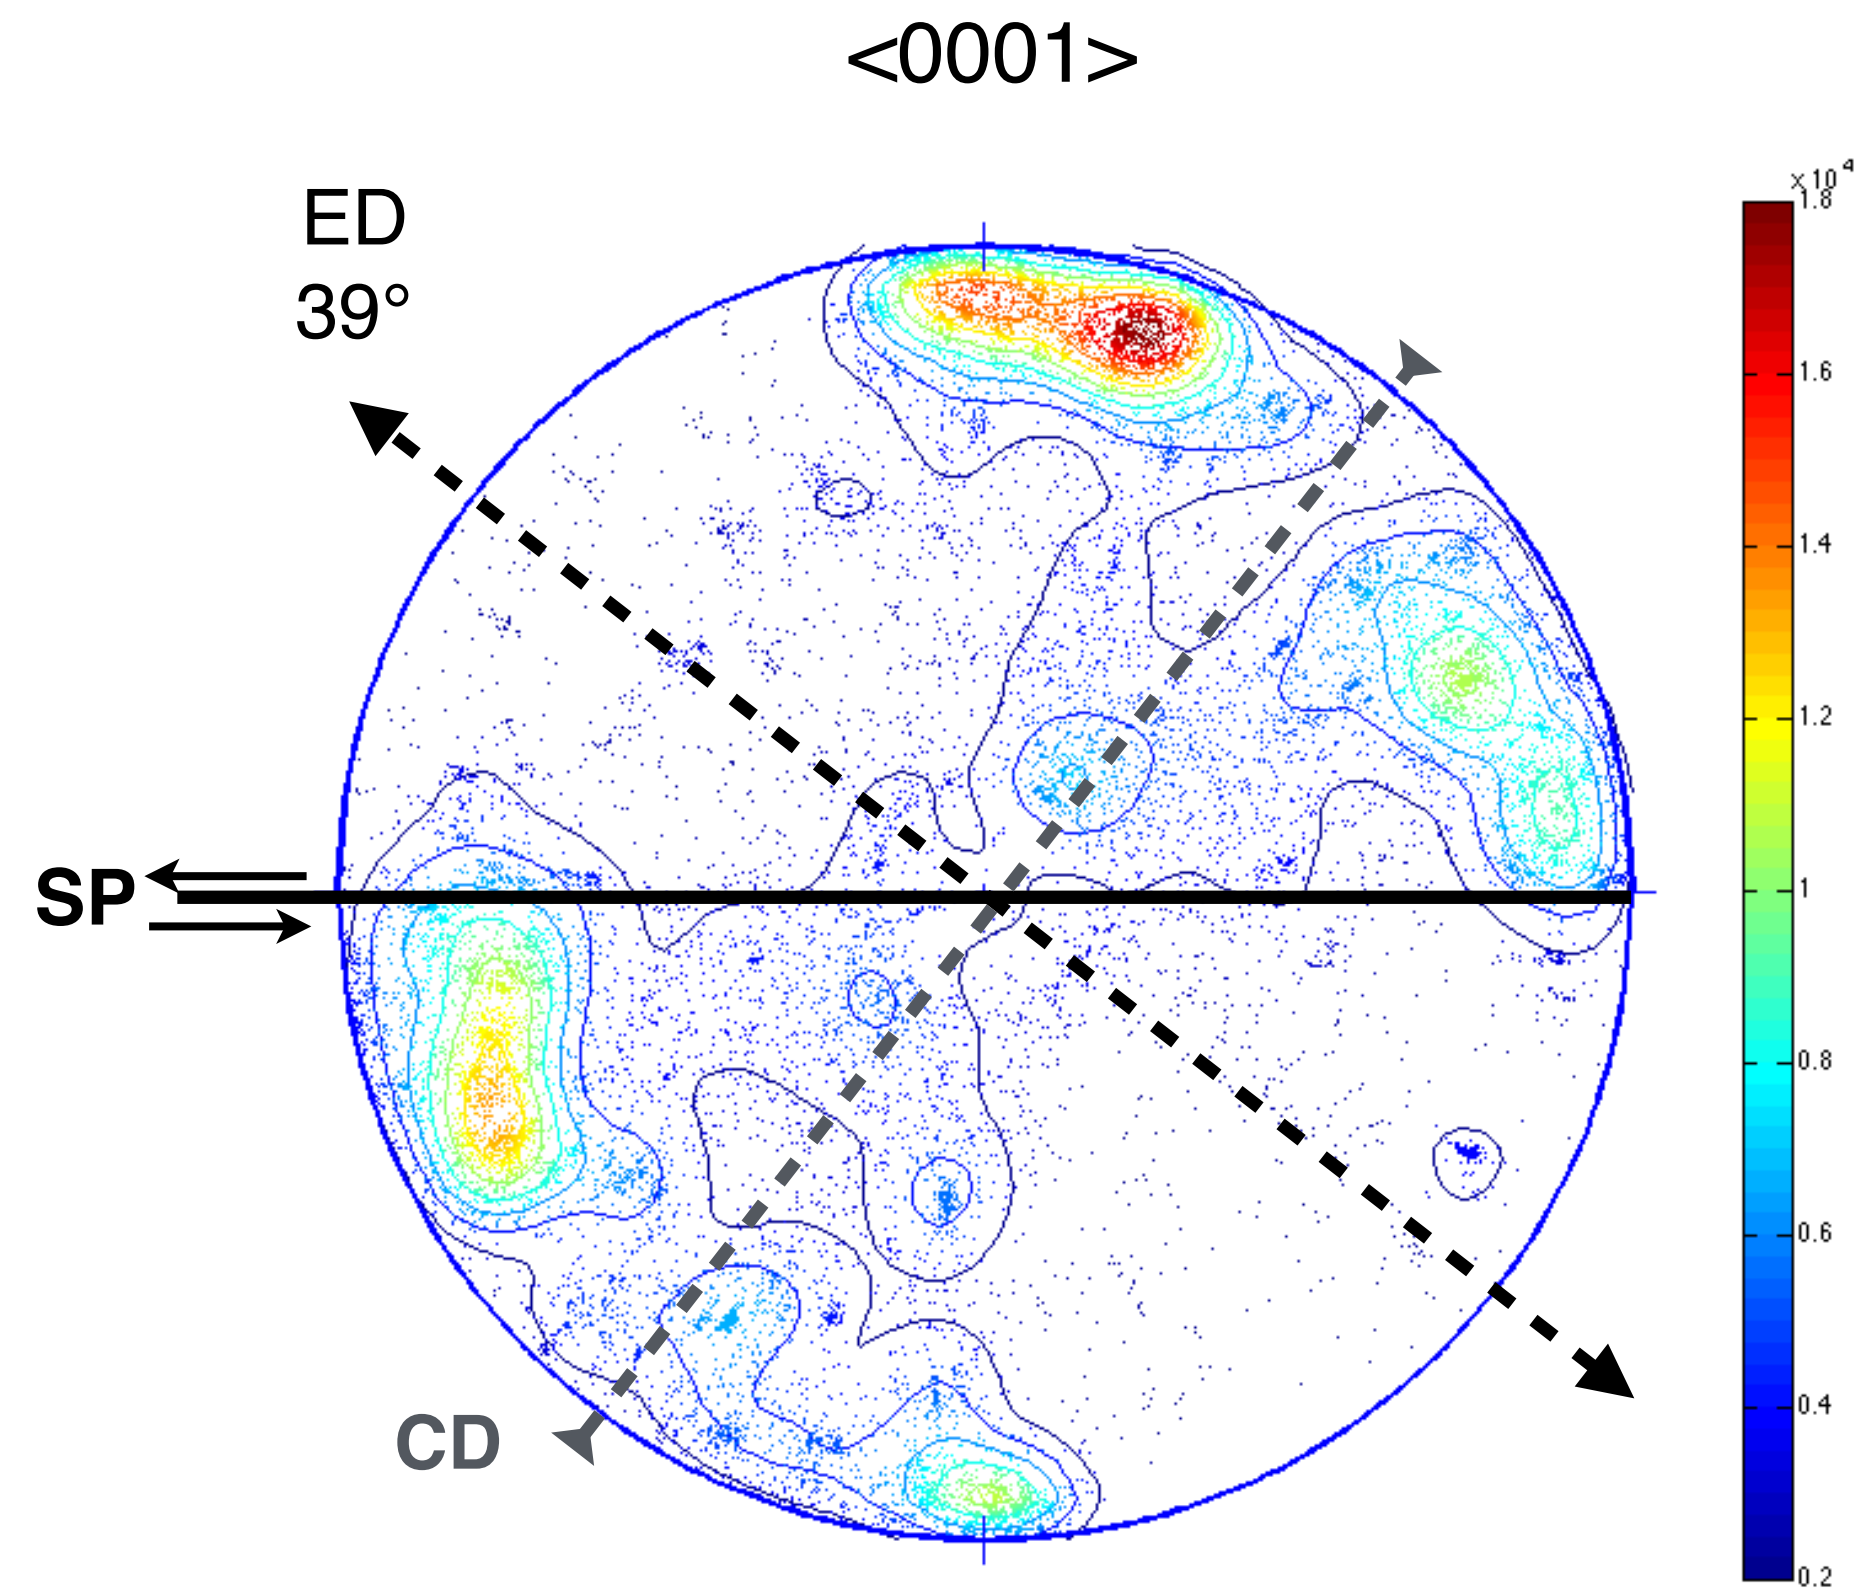

Grain size

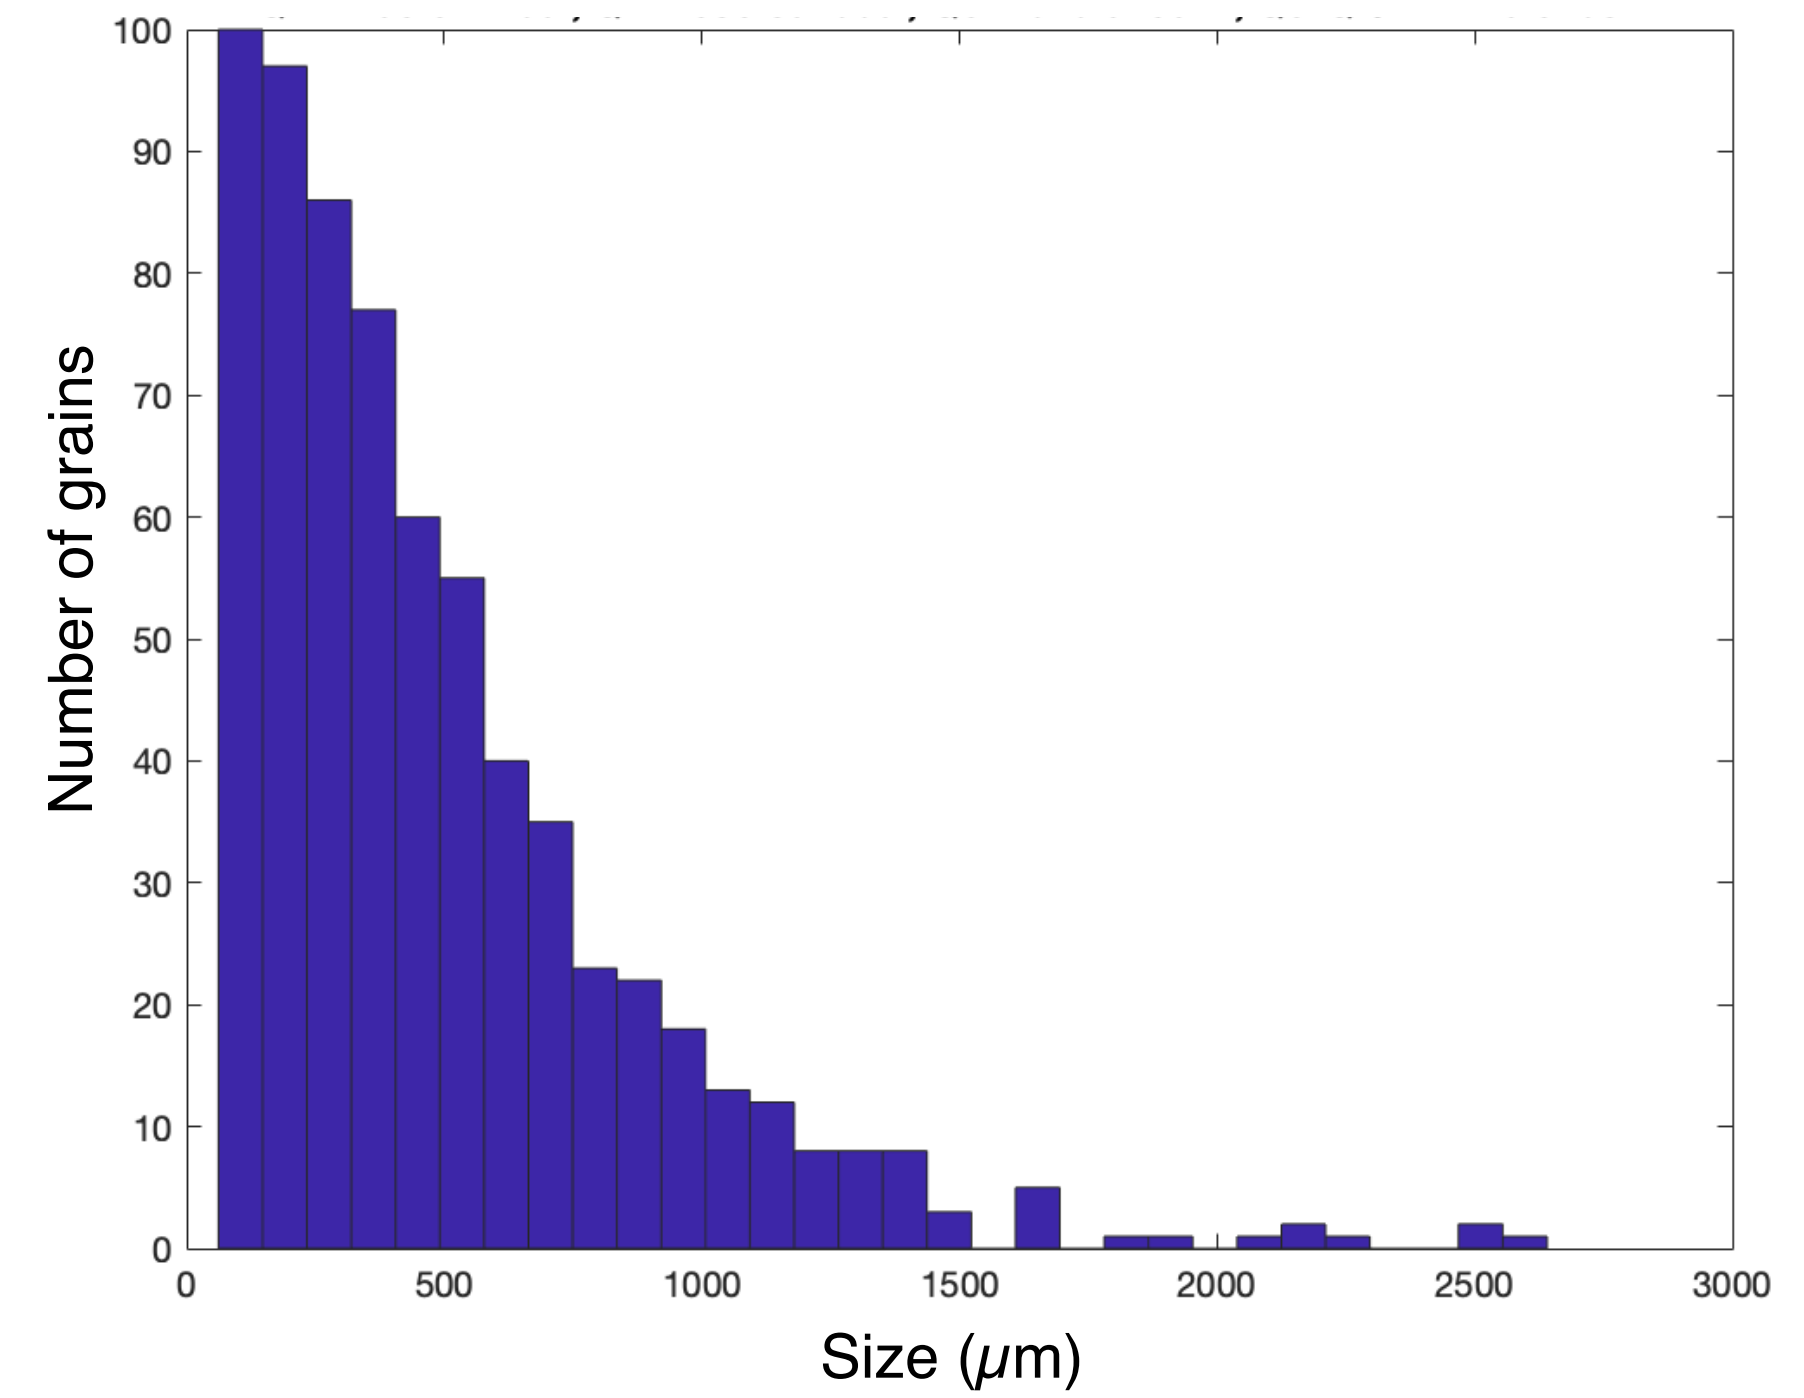

EBSD

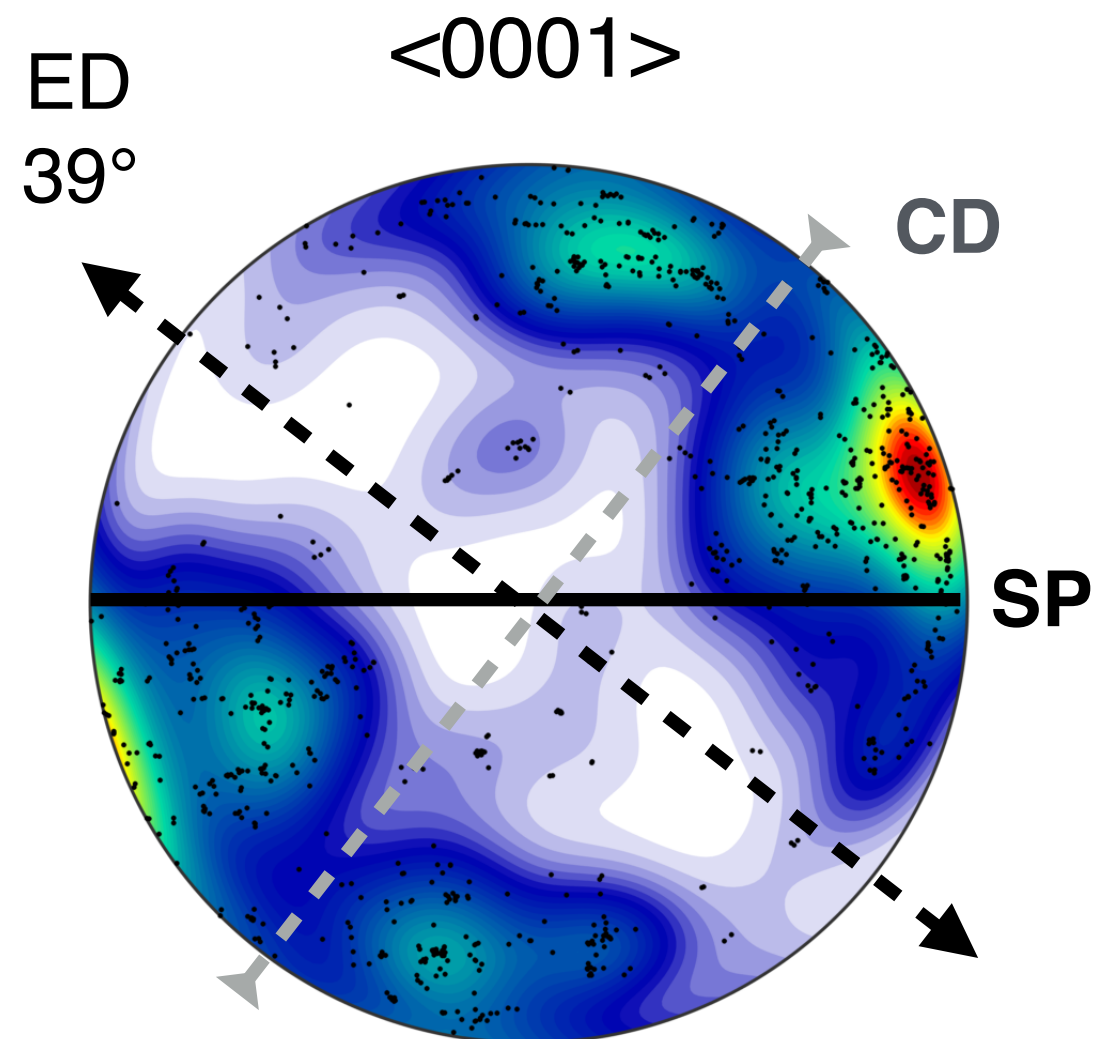

$\langle 10-10 \rangle$

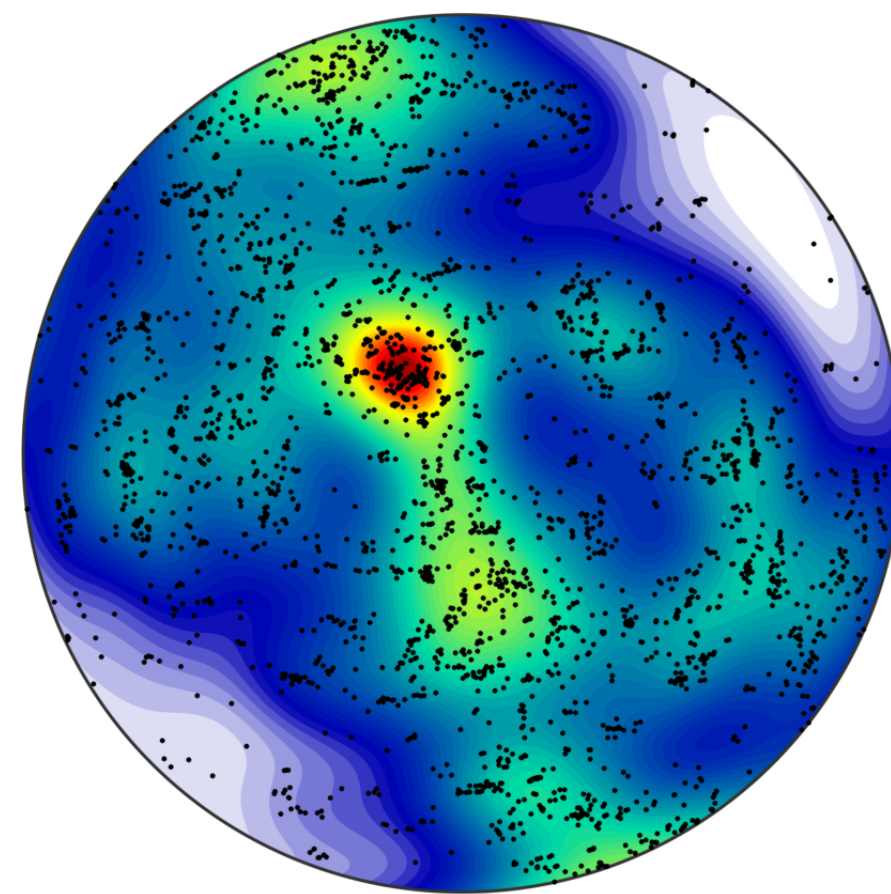

$\langle 11-20 \rangle$

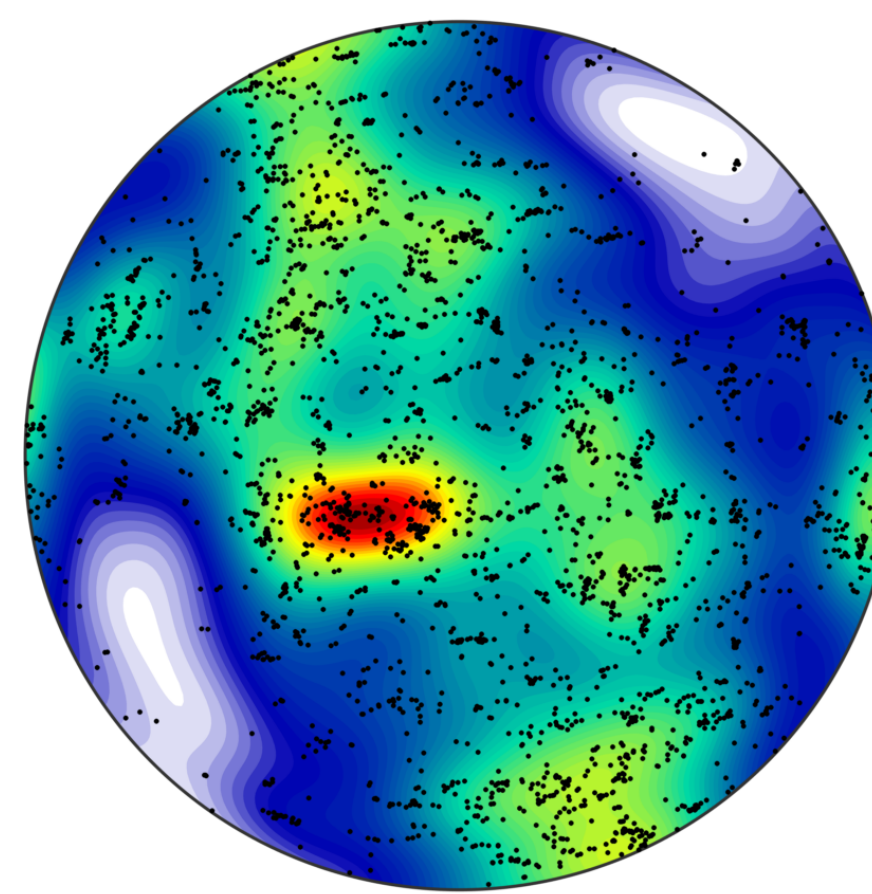

Grain size

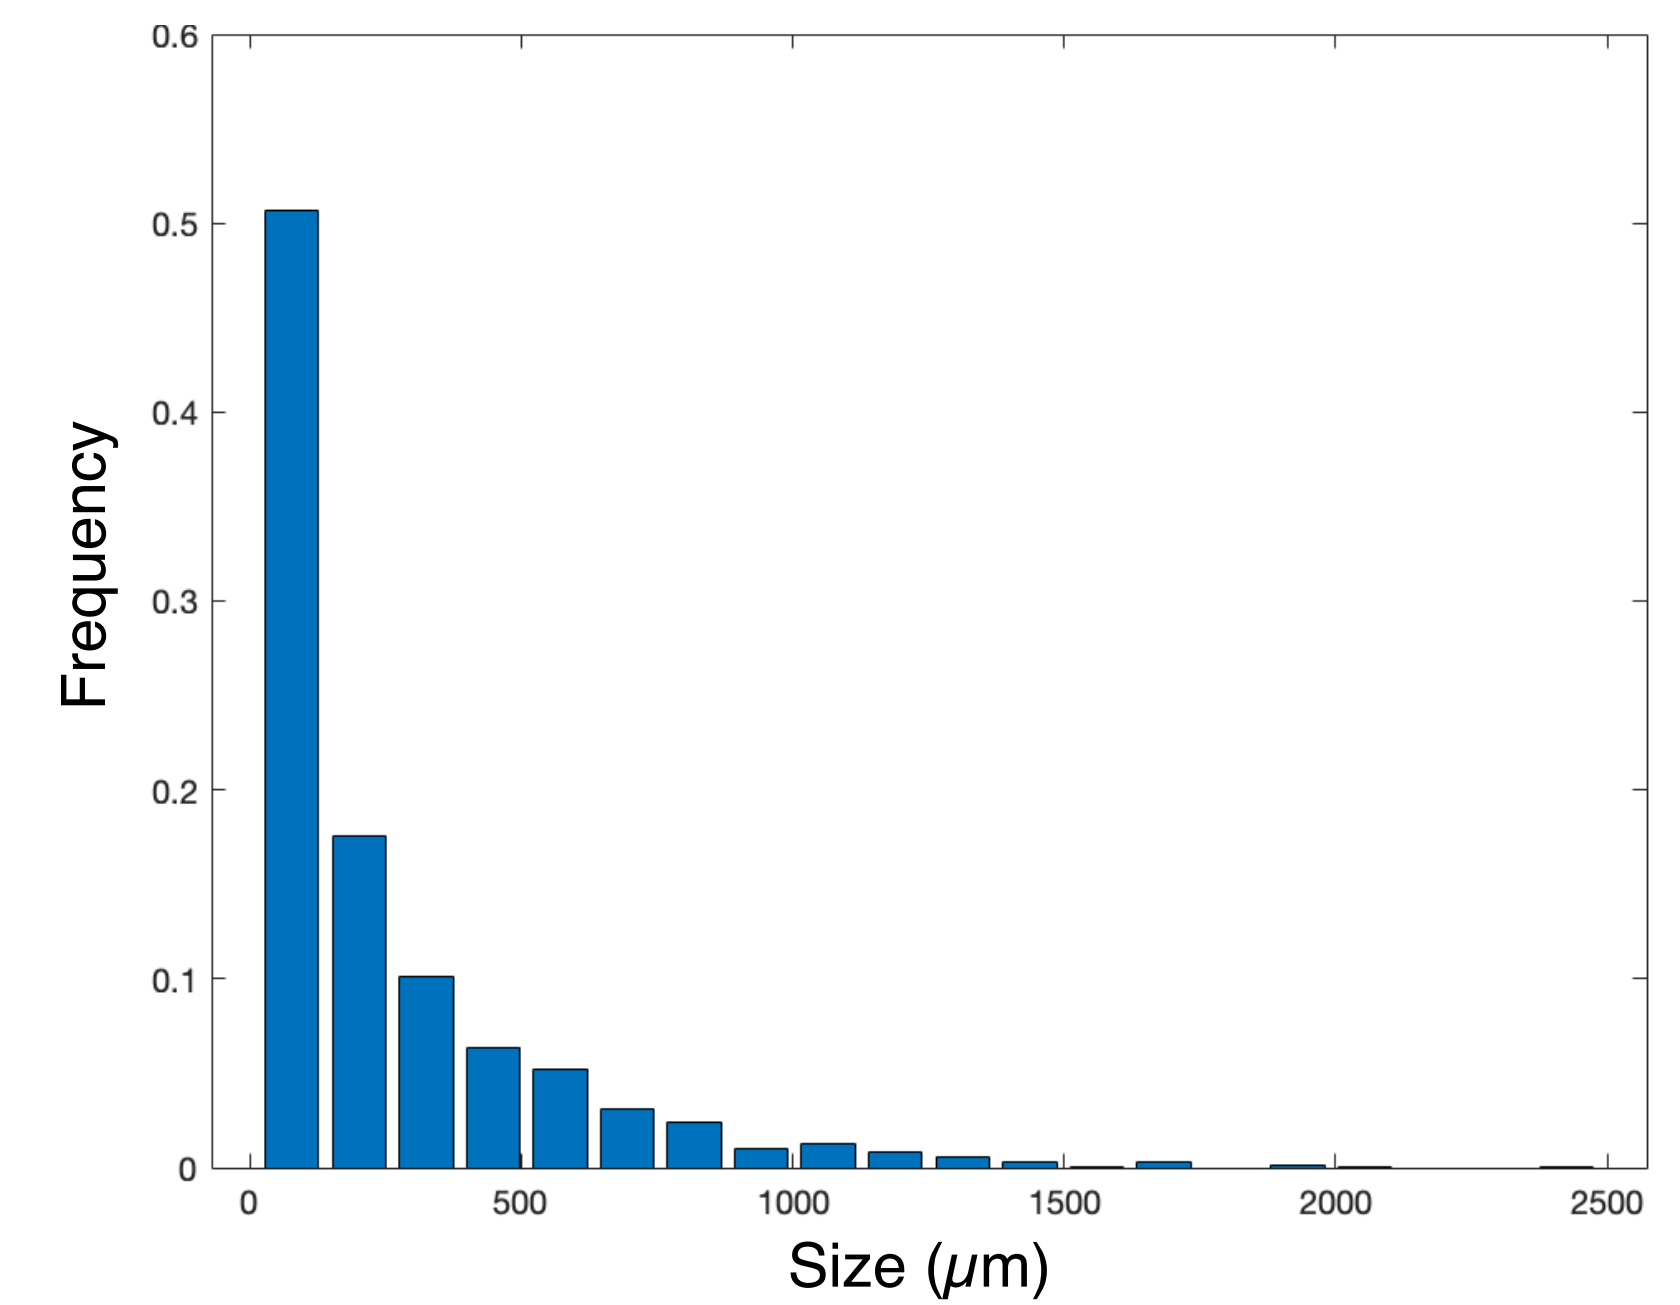



TGI0.71

# Supplementary material

AITA

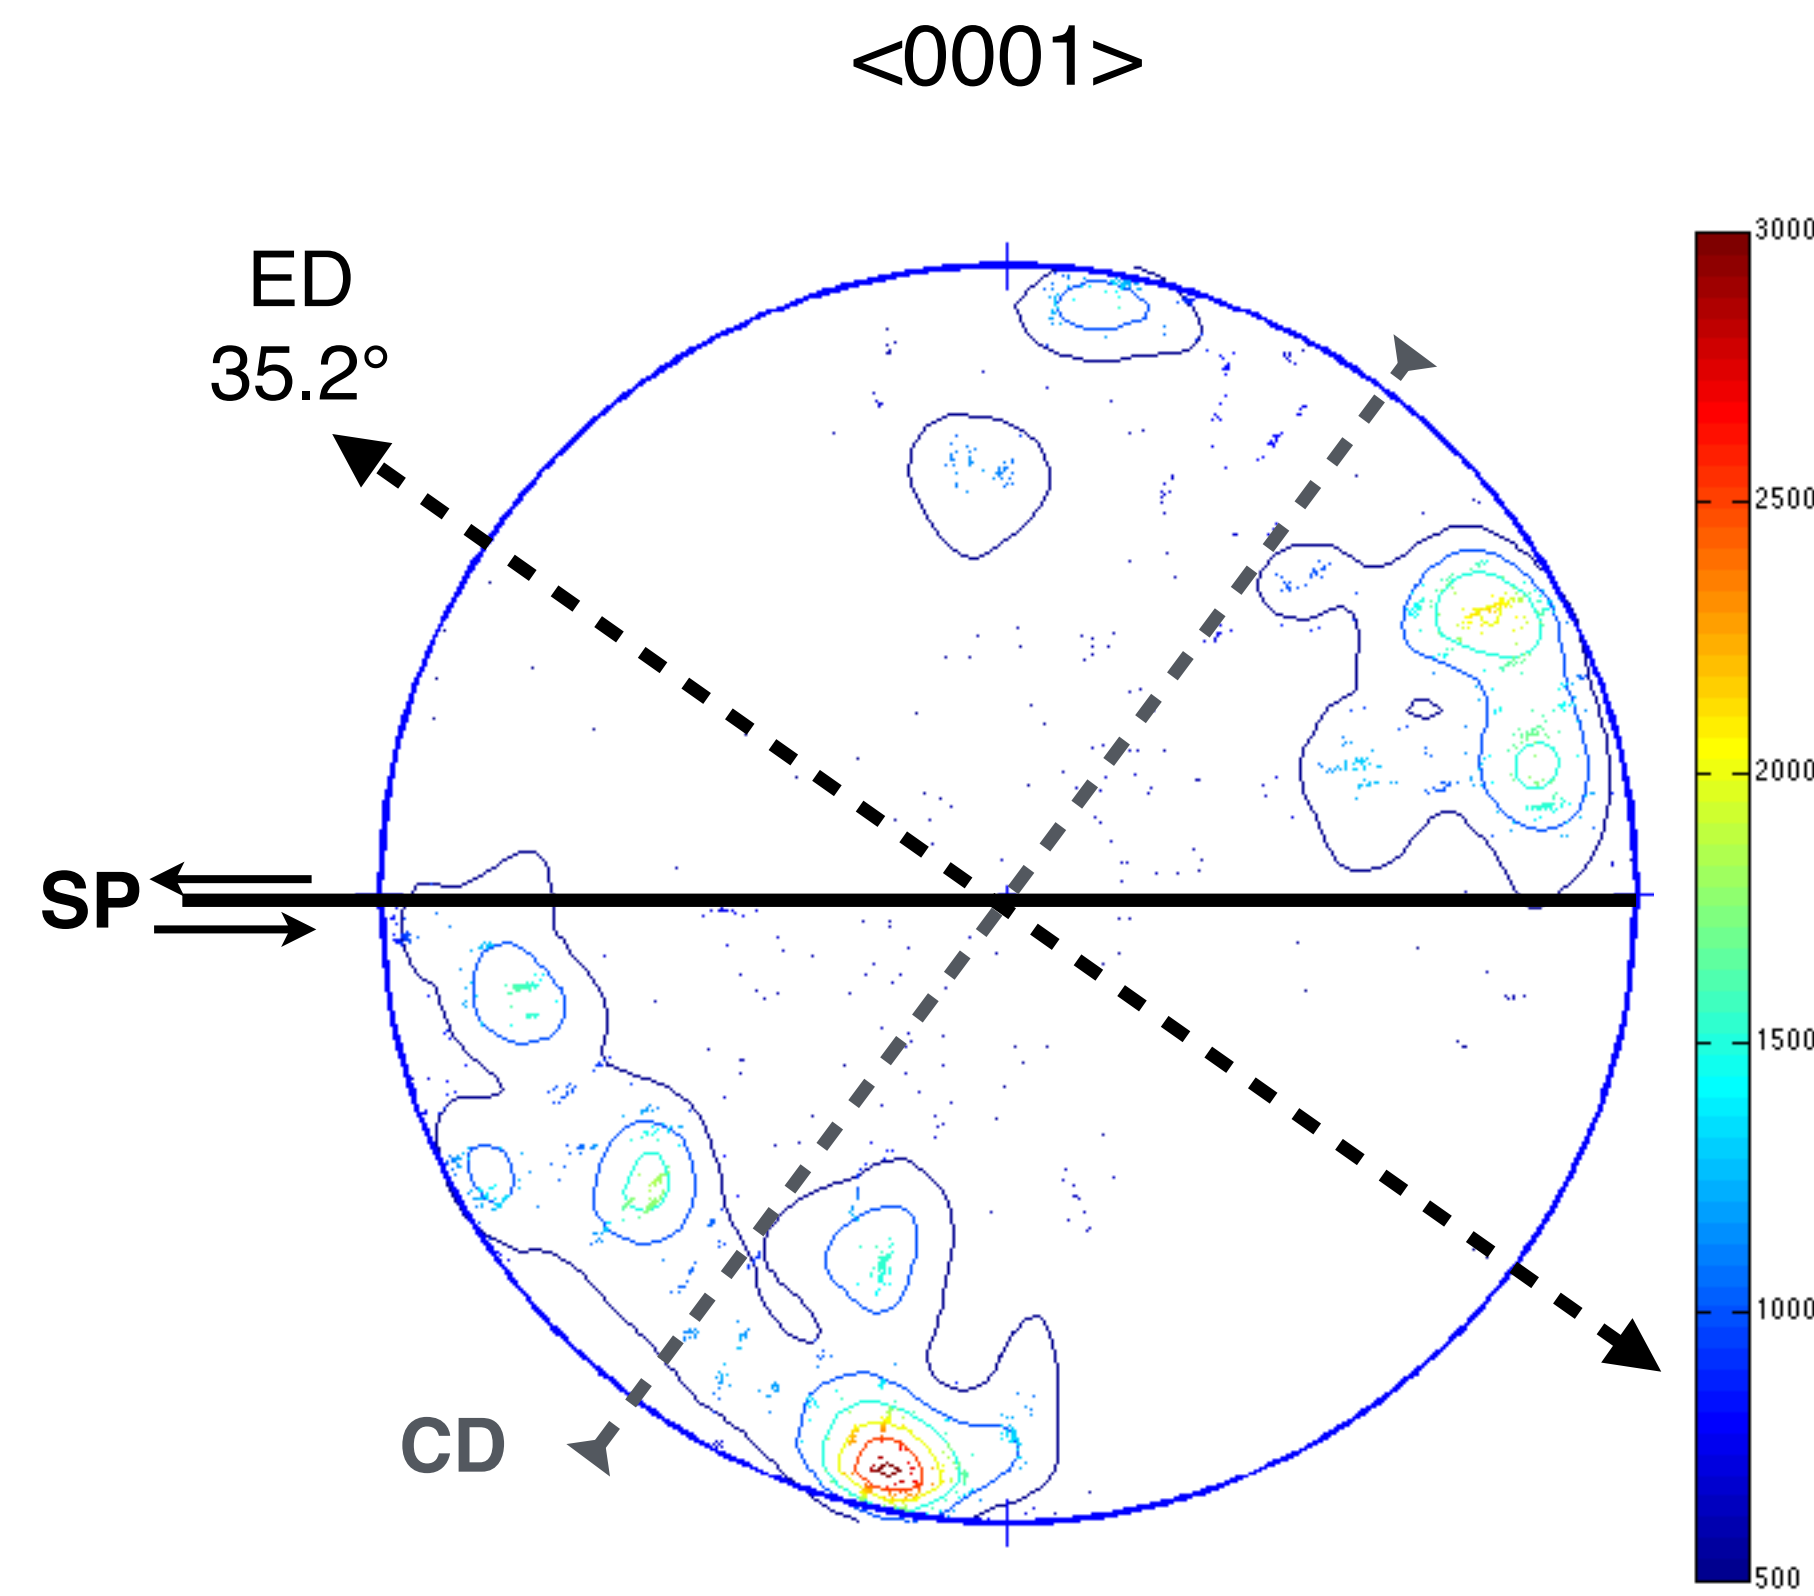

Grain size

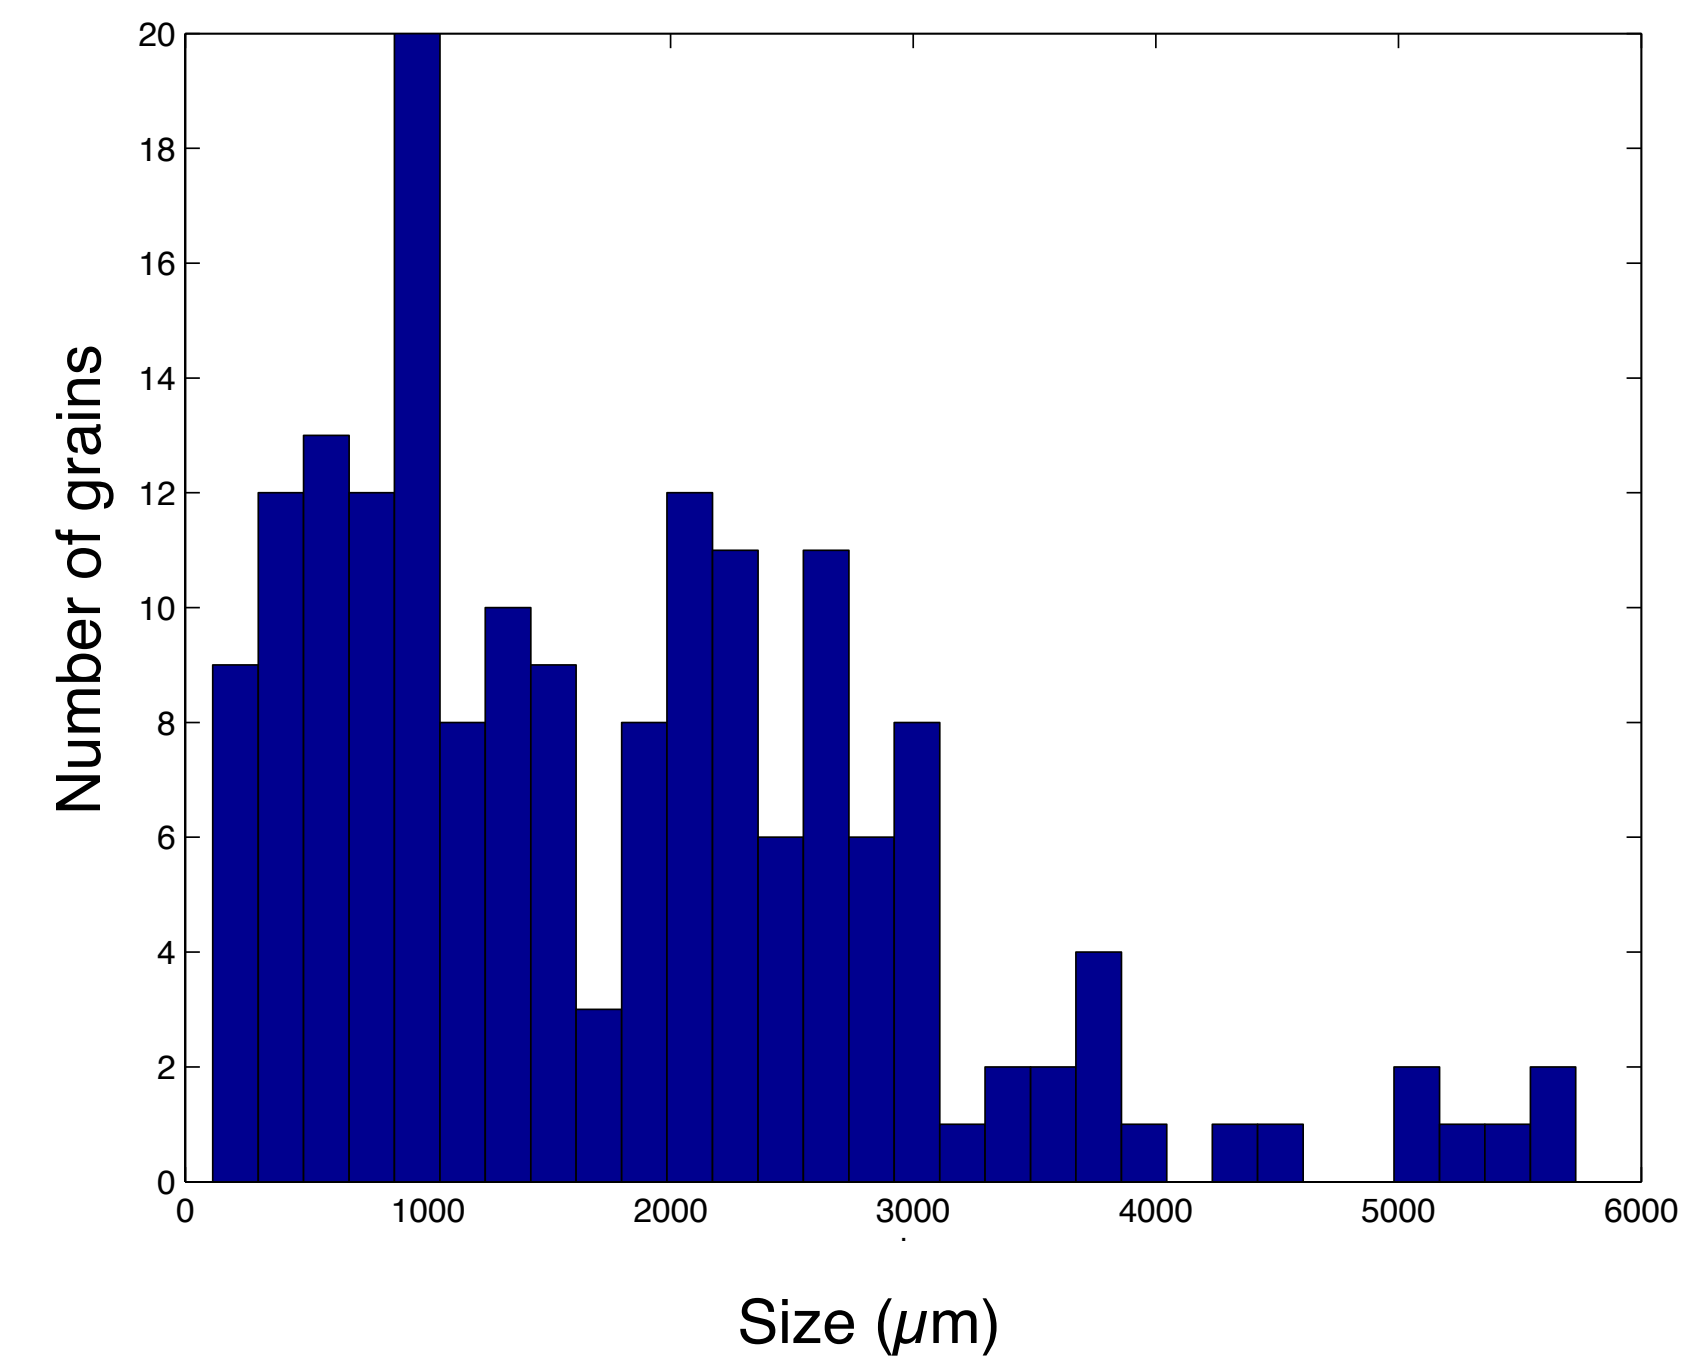

EBSD

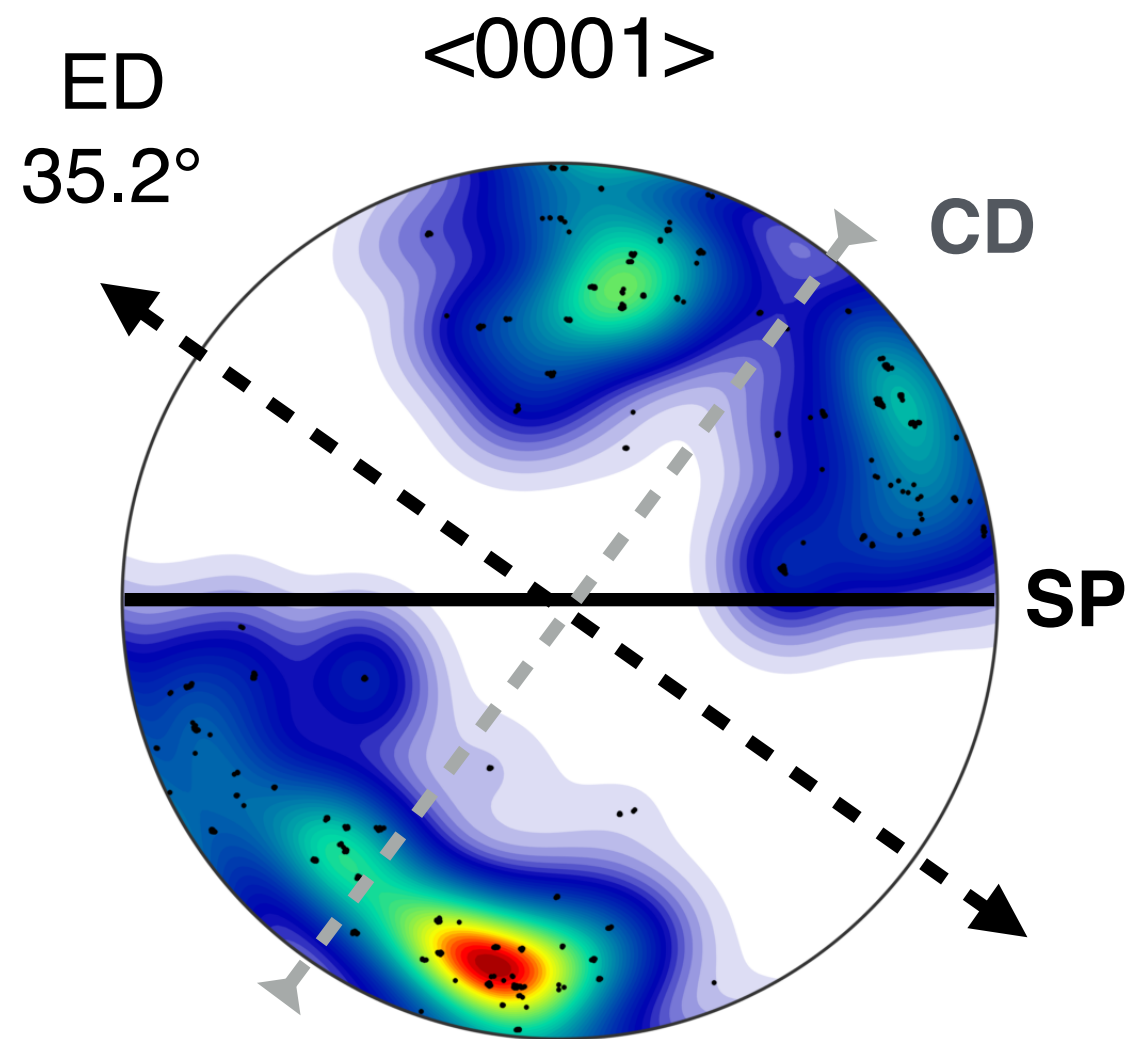

$\langle 10-10 \rangle$

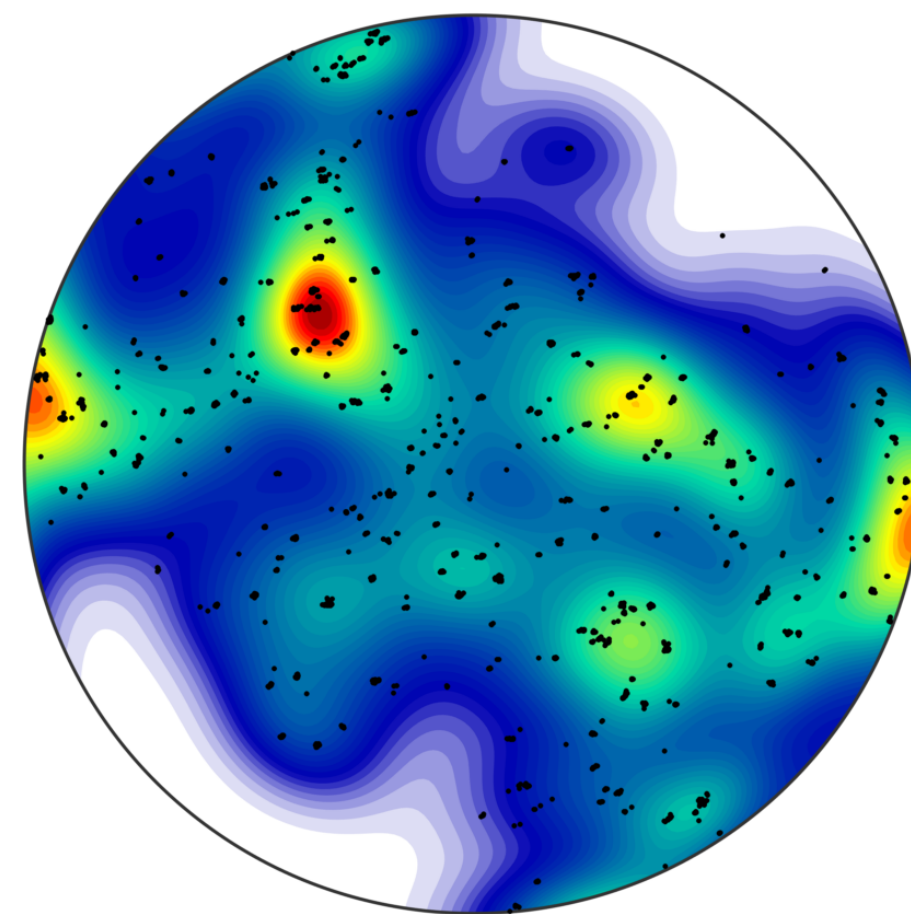

$\langle 11-20 \rangle$

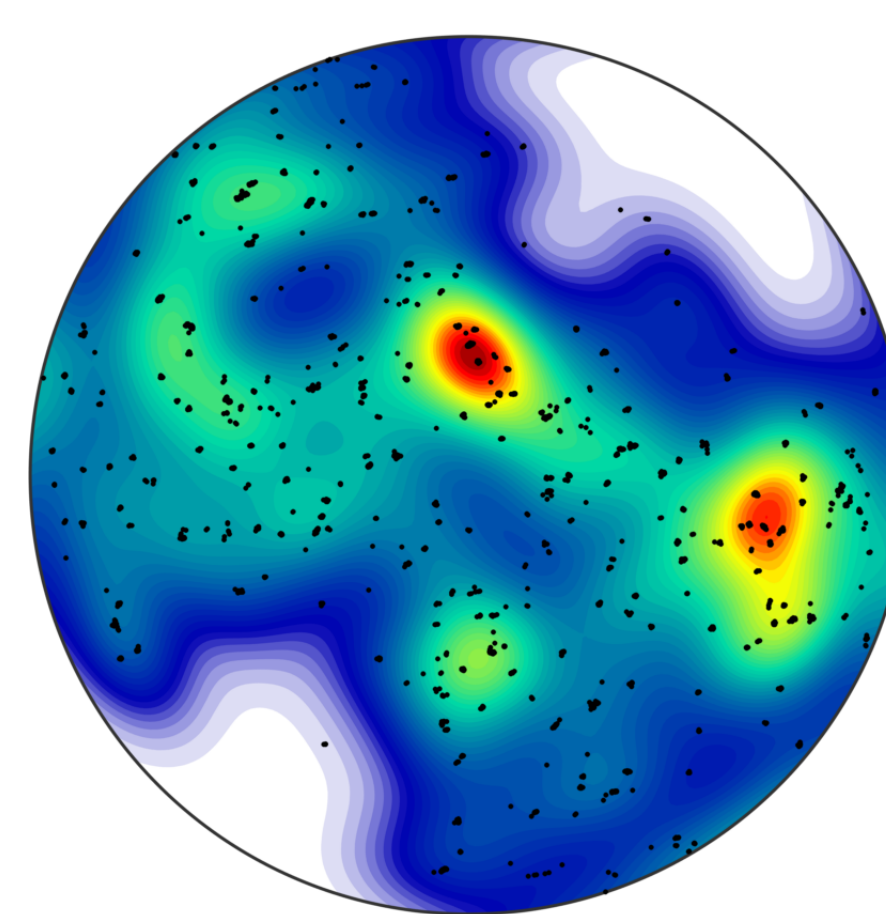

Grain size

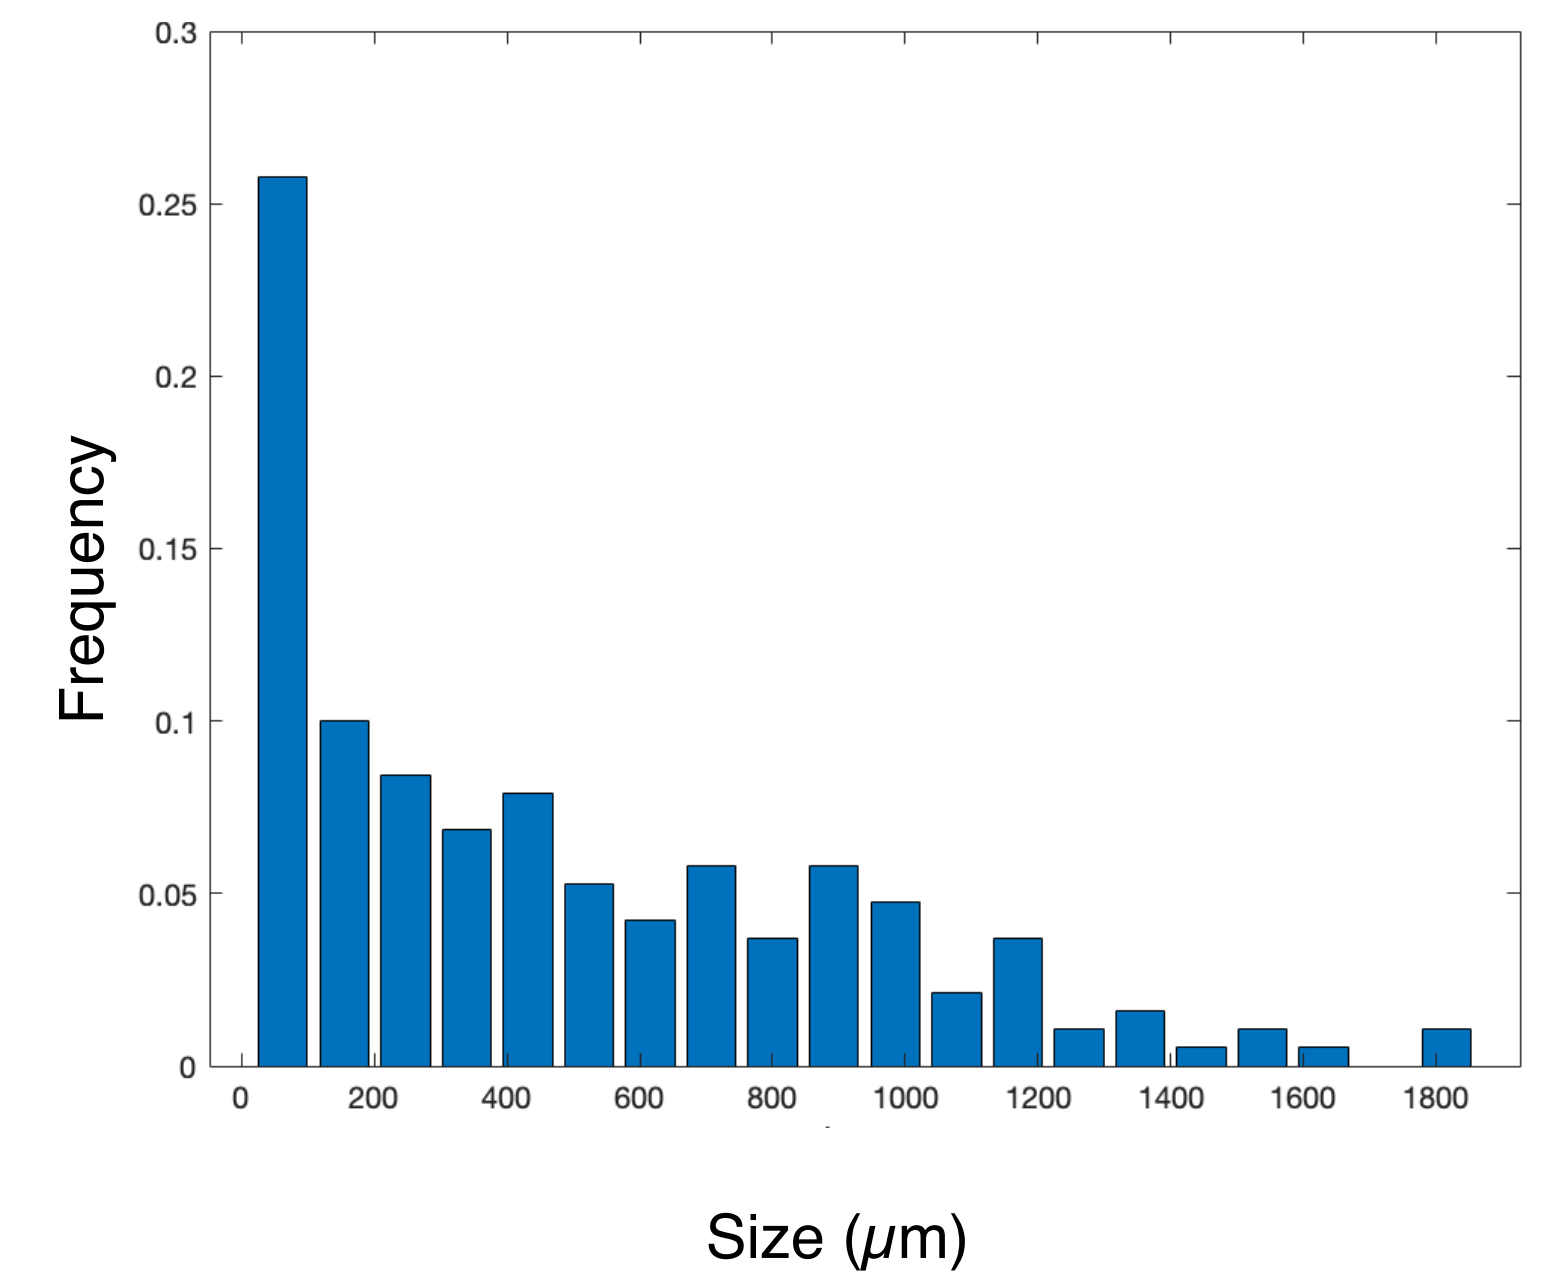

TGI1.96

# Supplementary material

AITA

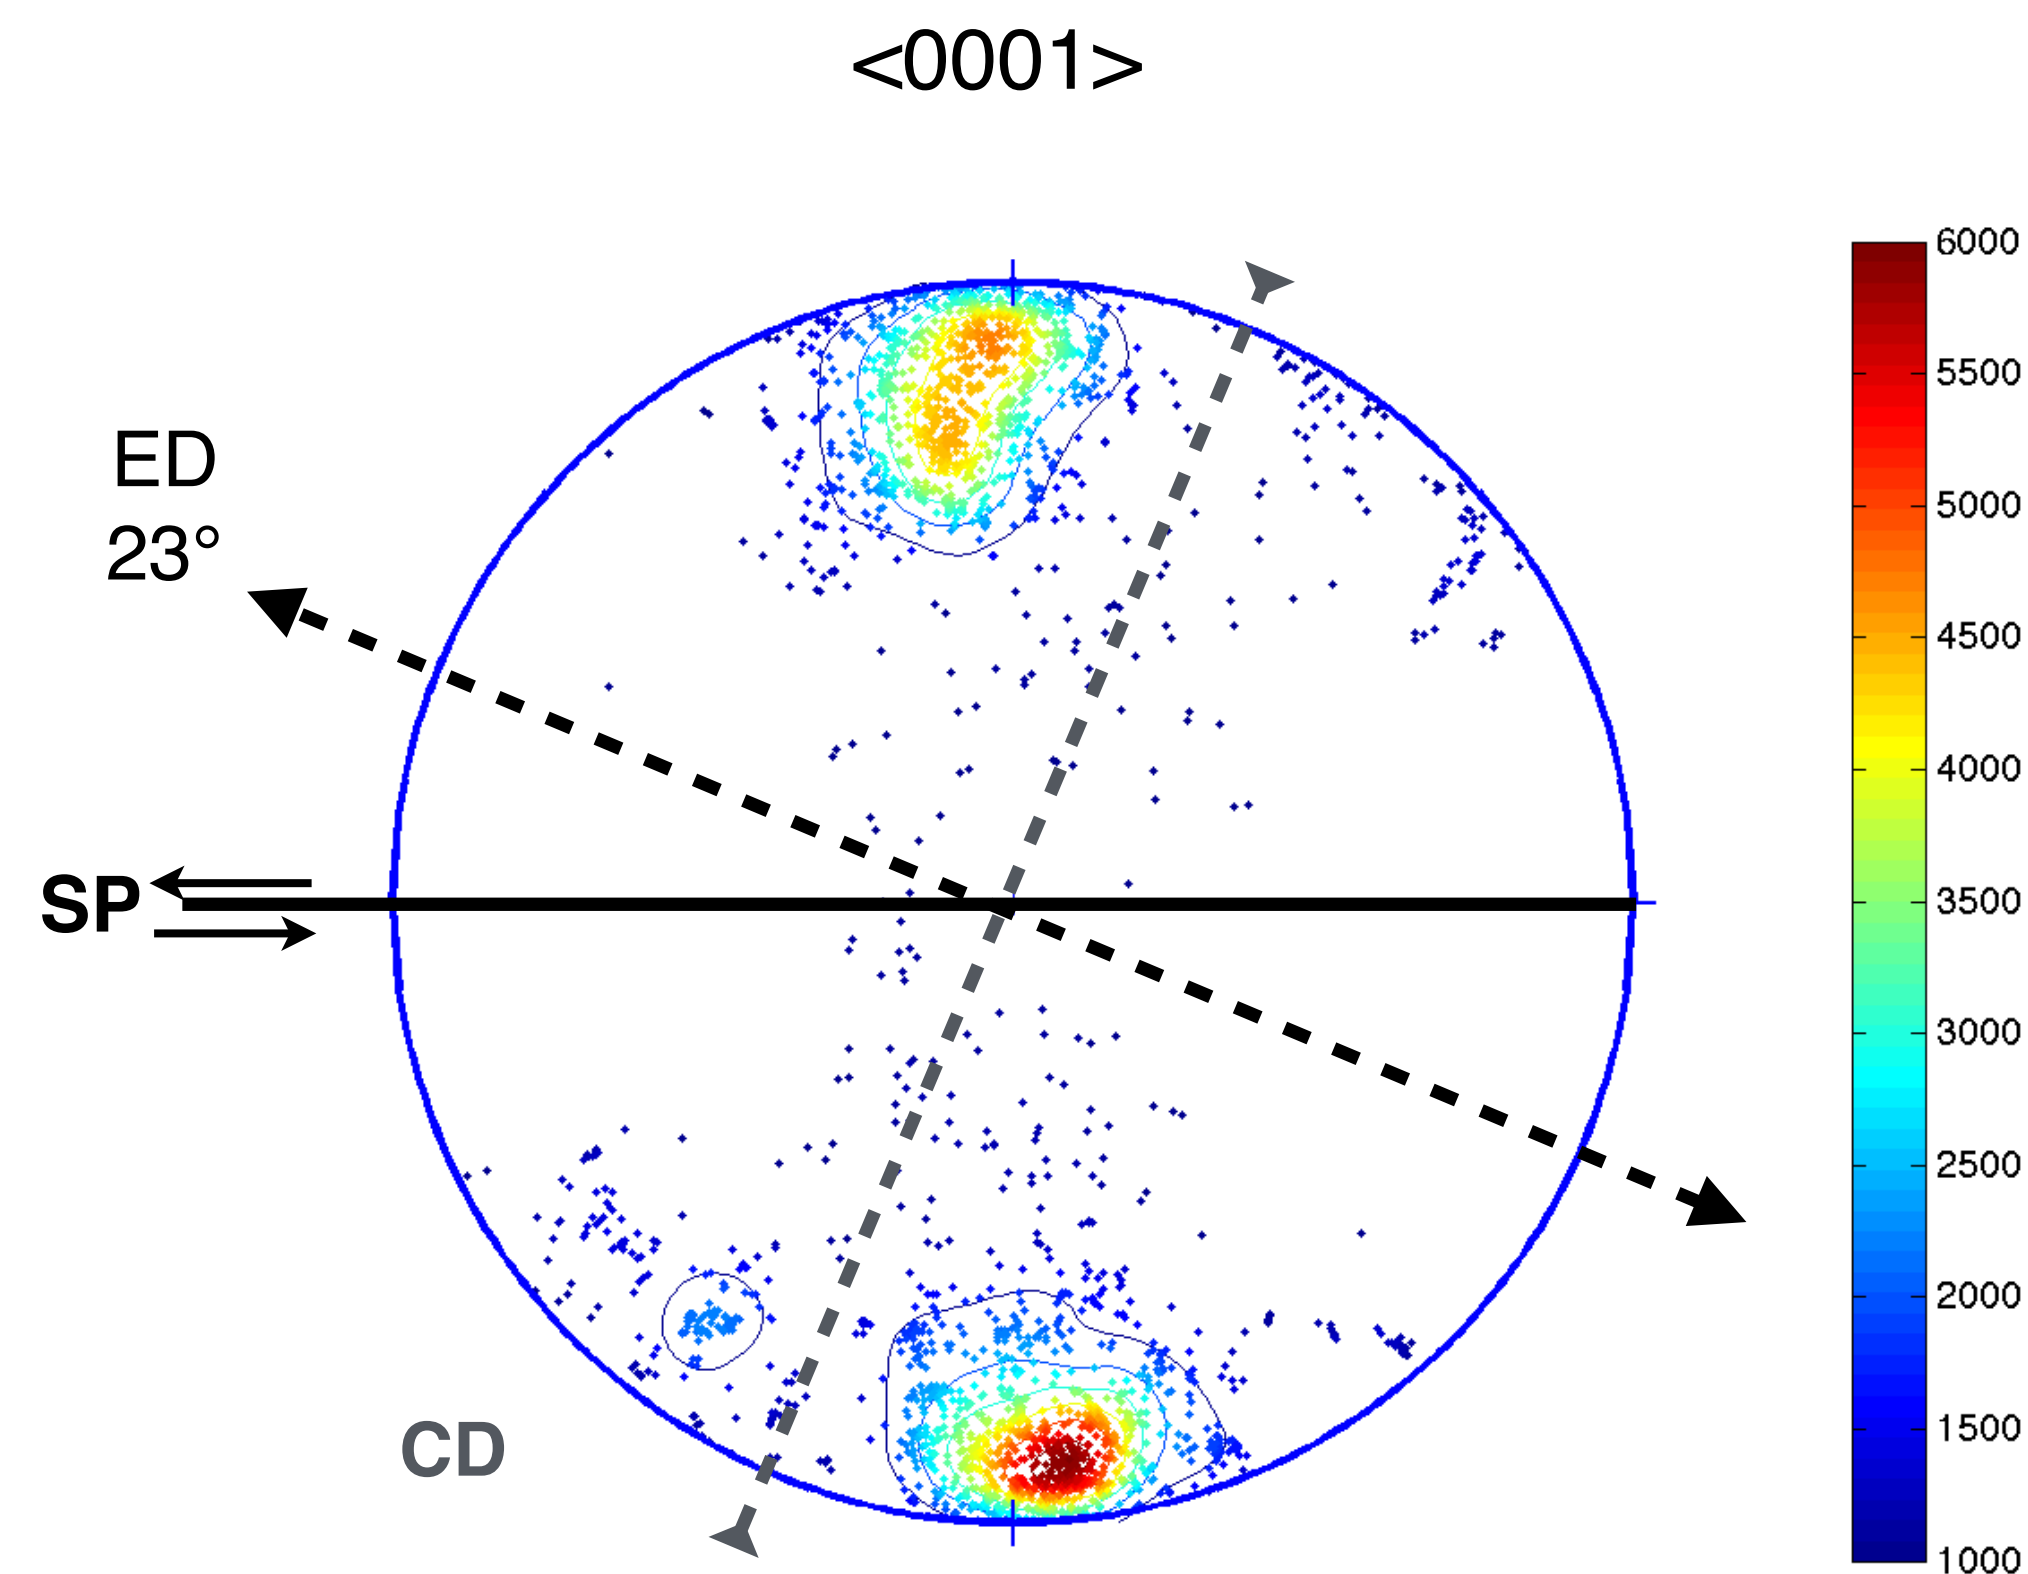

Grain size

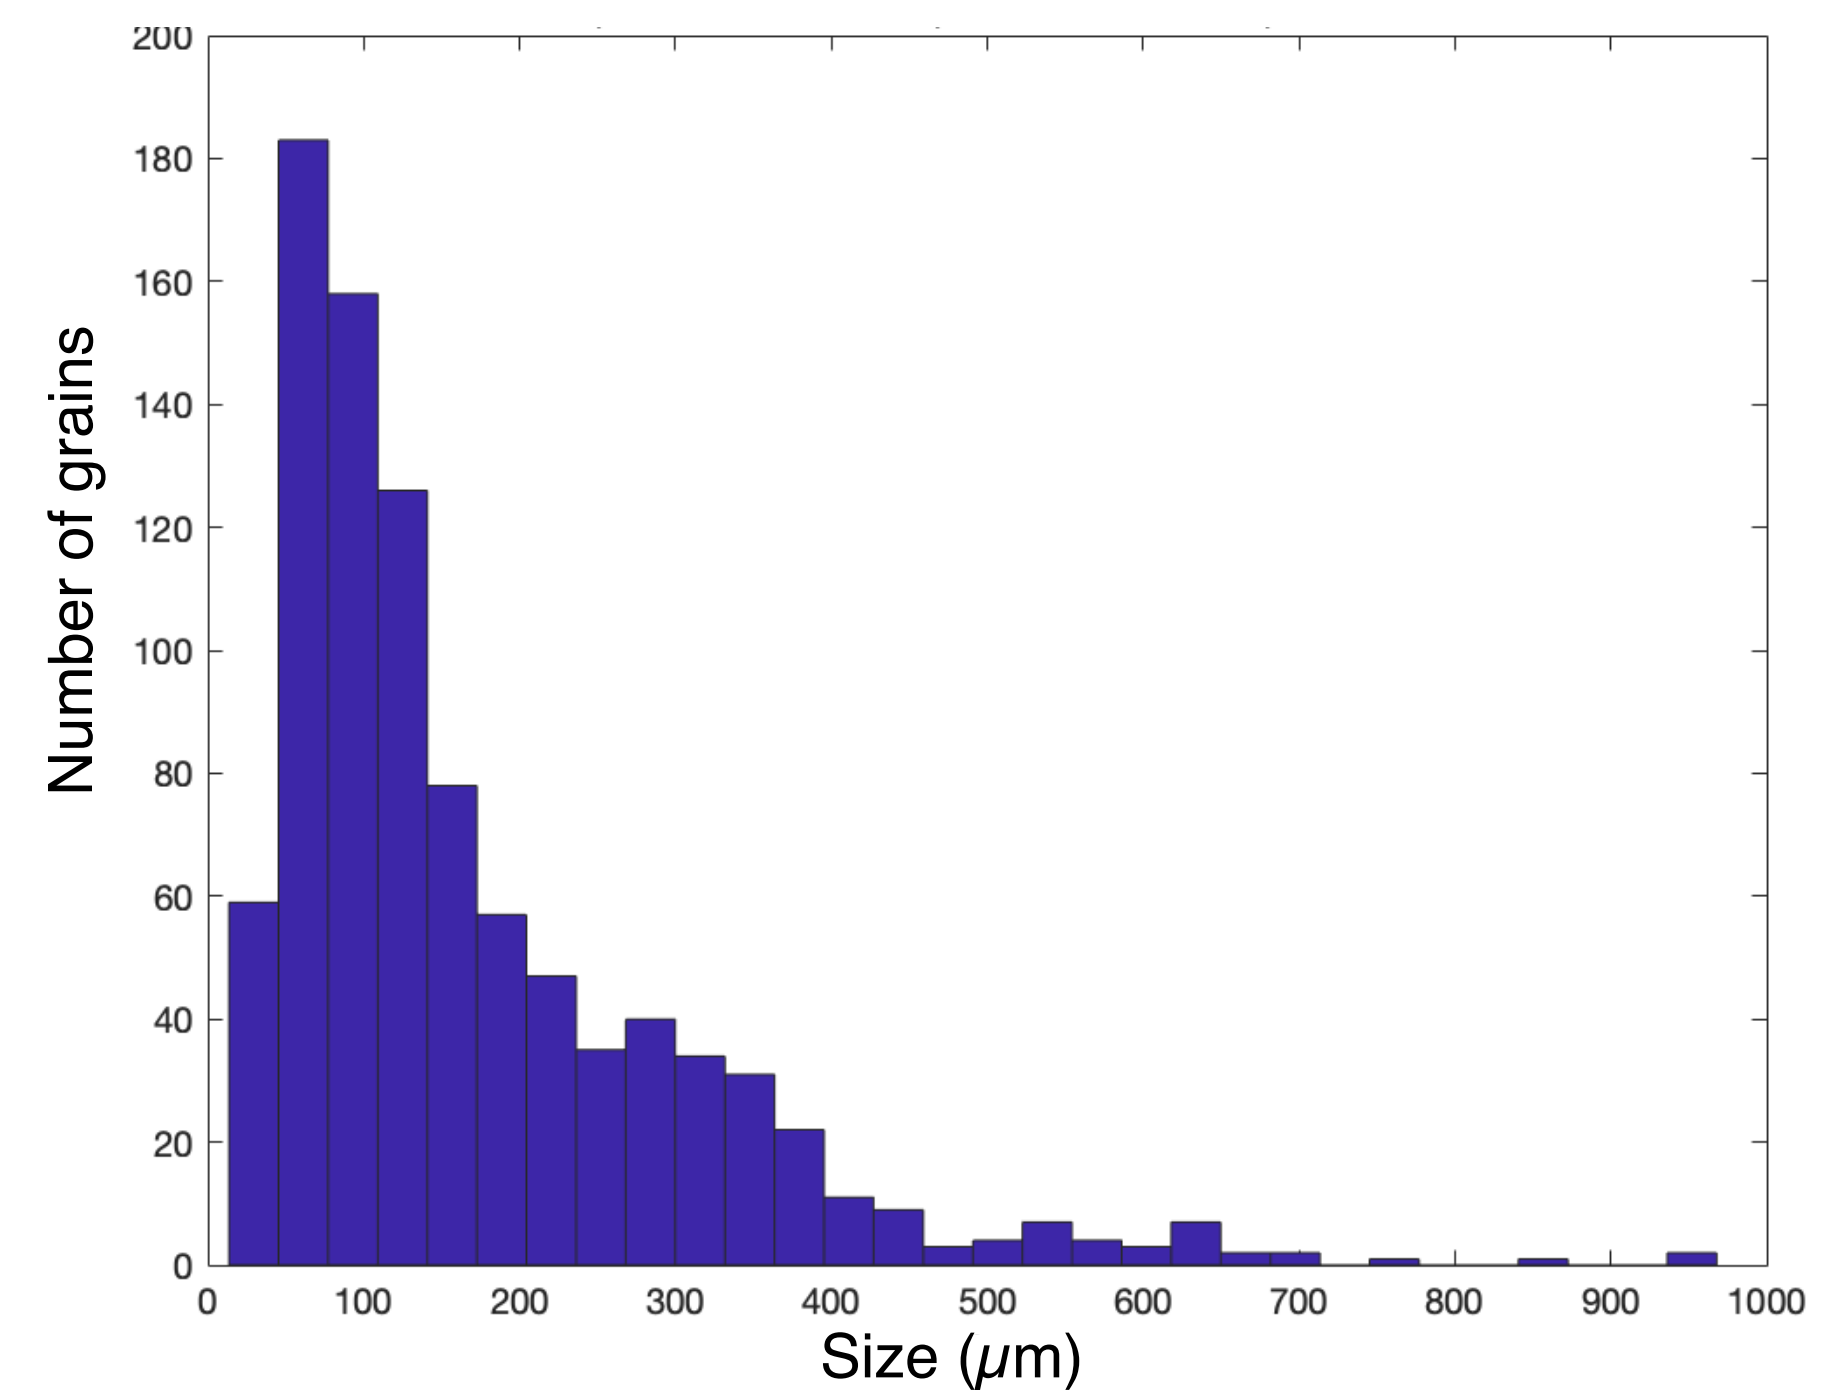

EBSD

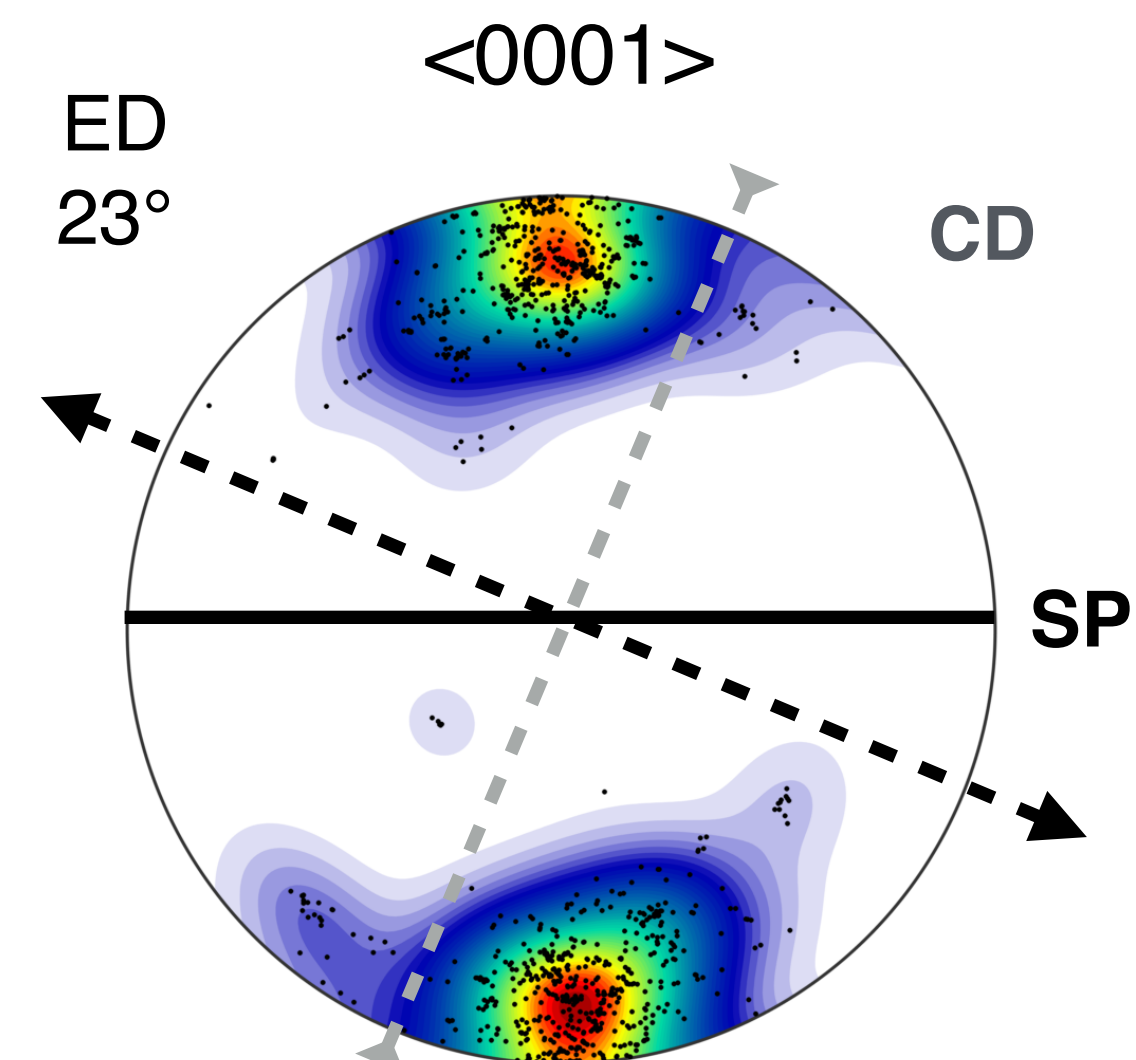

$\langle 10-10 \rangle$

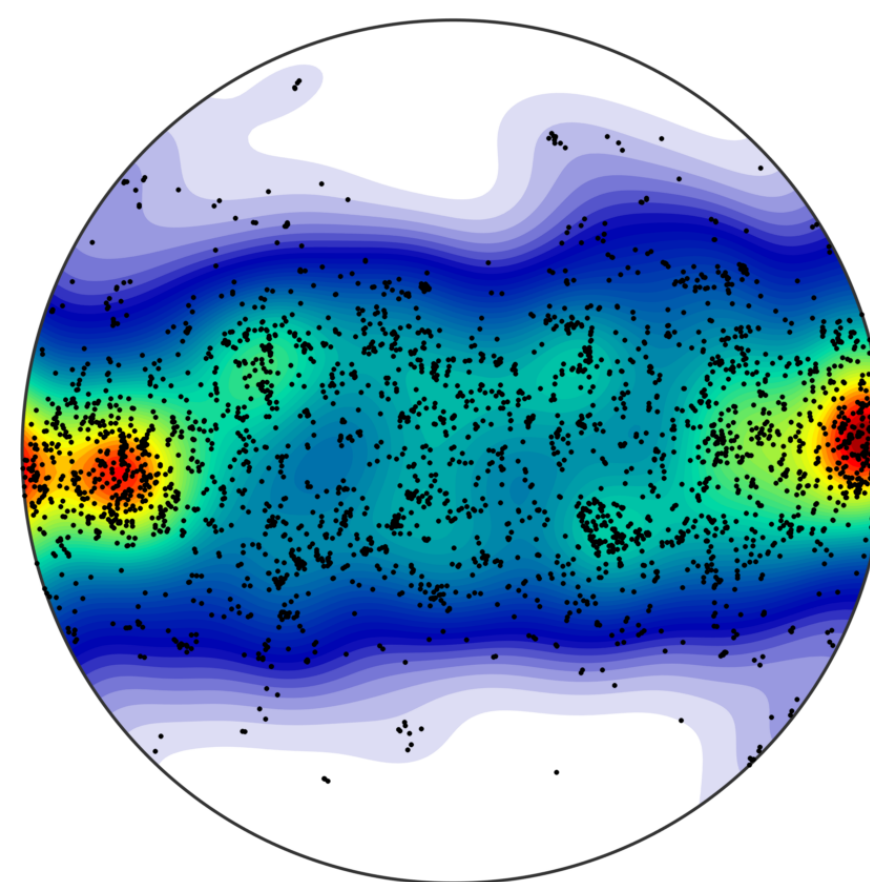

$\langle 11-20 \rangle$

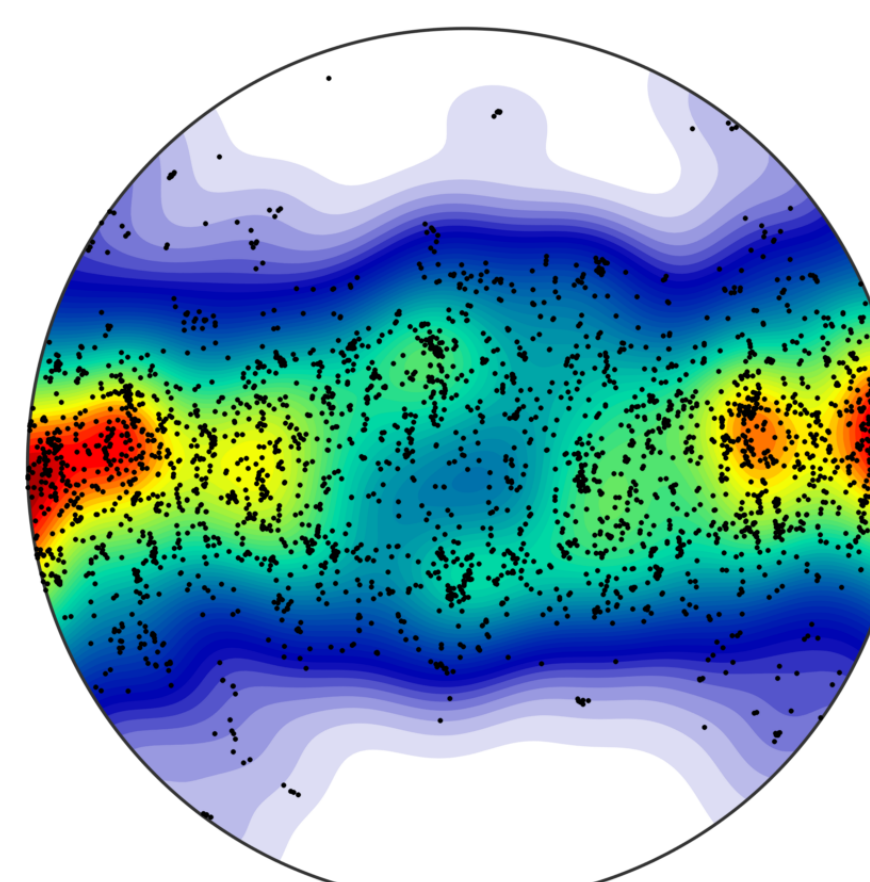

Grain size

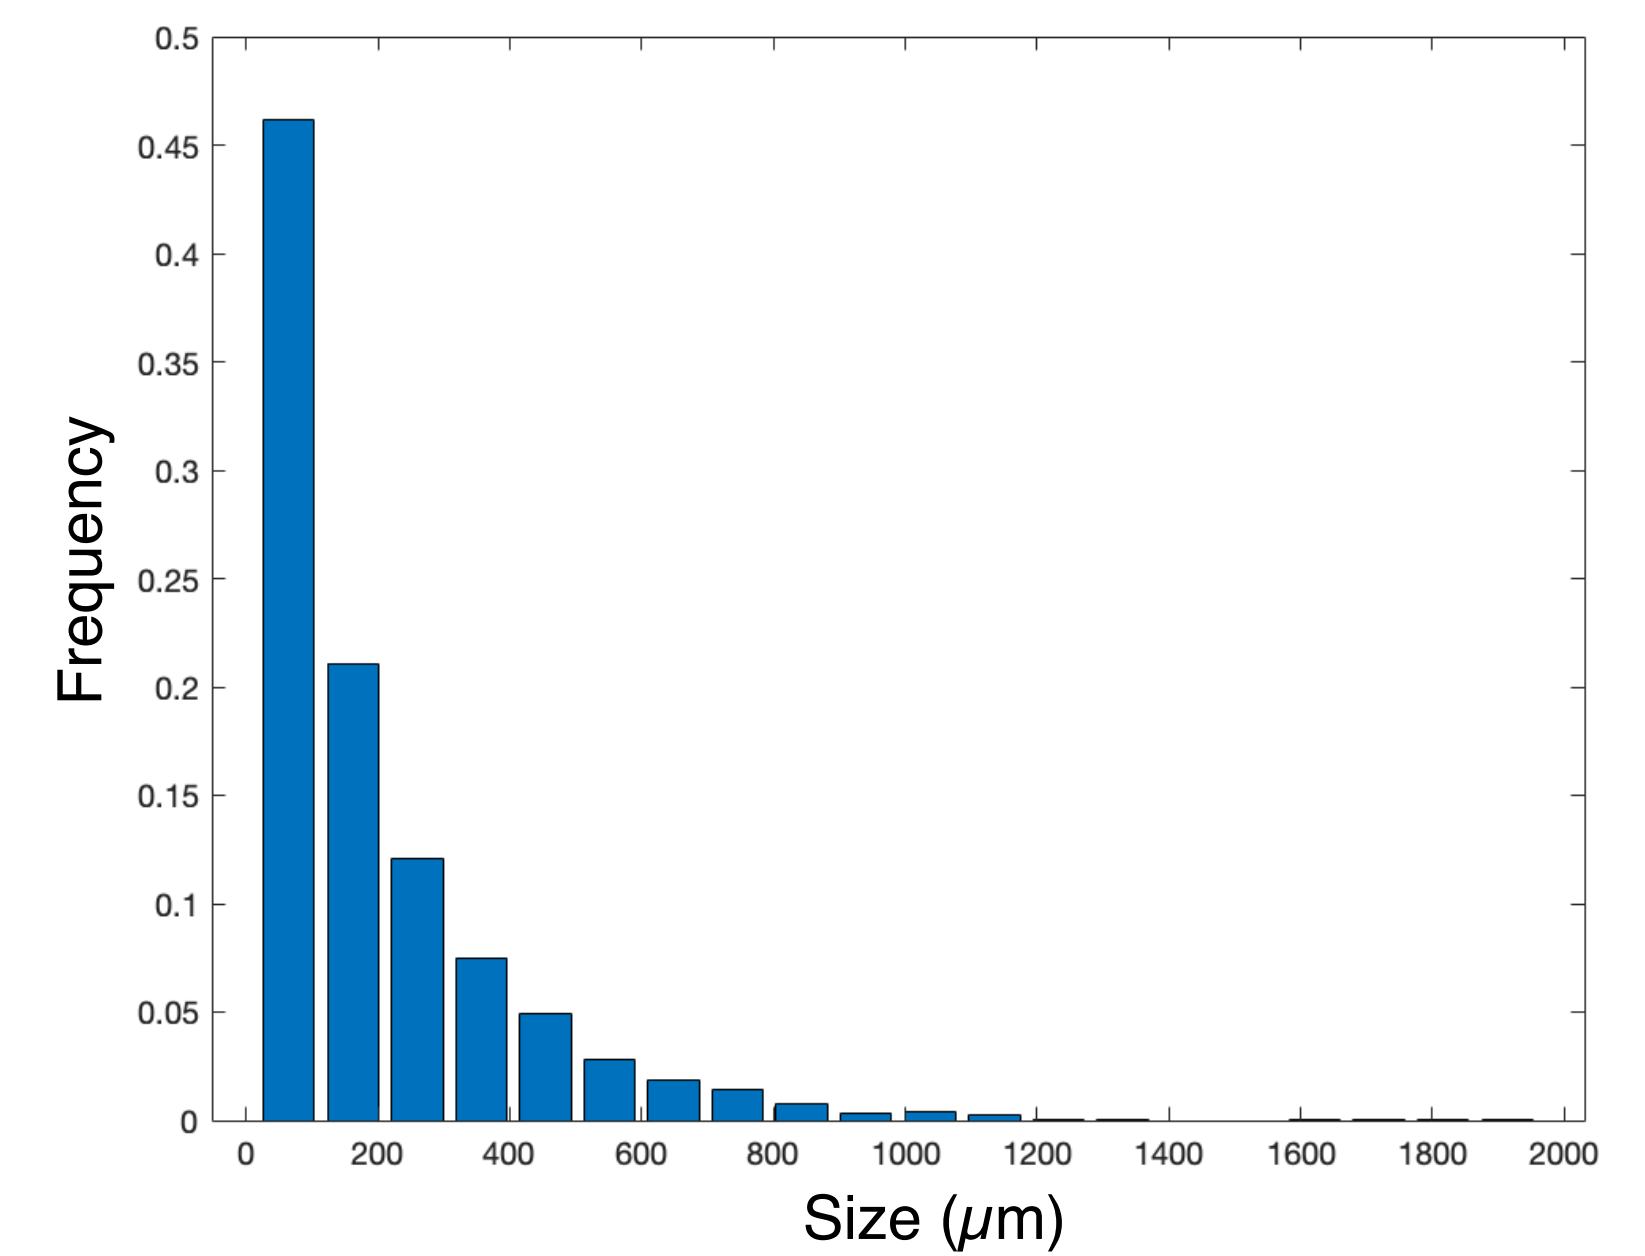

Supplement: Supplementary file [file Fig_supplementary.pdf › Fig_supplementary.pdf]
